# Supplementary material for: A novel approach for the synthesis of imidazo and triazolopyridines from dithioesters
Source: Royal Society of Chemistry journal article supplement (doi:10.1039/c6nj01038e), 2016-01-01

## Electronic Supplementary Information for New Journal of Chemistry

### Novel Approach for the Synthesis of Imidazo and Triazolopyridines from Dithioesters

Ajjahalli. B. Ramesha,<sup>a</sup> Nagarakere. C. Sandhya,<sup>b</sup> Chottanahalli. S. Pavan Kumar,<sup>a</sup>  
Mahanthawamy Hiremath,<sup>a</sup> Kempegowda Mantelingu<sup>a\*</sup> and Kanchugarakoppal. S. Rangappa,<sup>a\*</sup>

| <b>Contents</b>                                                                   | <b>Page</b>    |
|-----------------------------------------------------------------------------------|----------------|
| <b>1. General information</b>                                                     | <b>S2</b>      |
| <b>2. General procedure for the synthesis of dithioesters and<br/>oxadiazoles</b> | <b>S2- S3</b>  |
| <b>3. <sup>1</sup>H NMR and <sup>13</sup>C NMR of compounds 3a-3o</b>             | <b>S4-S37</b>  |
| <b>4. <sup>1</sup>H NMR and <sup>13</sup>C NMR of compounds 5a-5e</b>             | <b>S38-S47</b> |

**General Information:** 2-methylaminopyridine, 2-hydrazinylpyridine and T3P were purchased from commercial sources and used as received. Reagent grade THF was purchased from Sigma-Aldrich and distilled over sodium. Purification of reaction products was carried out by flash column chromatography using Sorbent Technologies Standard Grade silica gel (60 Å, 230–400 mesh). Analytical thin layer chromatography was performed on EM Reagent 0.25 mm silica gel 60 F254 plates. Visualization was accomplished with UV light, potassium permanganate and DragendorffMunier stains followed by heating. Melting points were recorded on a Thomas Hoover capillary melting point apparatus and are uncorrected. Proton nuclear magnetic resonance spectra (<sup>1</sup>H-NMR) were recorded on Agilent-400 MHz and are reported in ppm using CDCl<sub>3</sub> and DMSO-d<sub>6</sub> as the internal standard. Data are reported as app = apparent, s = singlet, d = doublet, t = triplet, q = quartet, m = multiplet, comp = complex, br = broad; and coupling constant(s) in Hz. Proton-decoupled carbon nuclear magnetic resonance spectra (<sup>13</sup>C-NMR) were recorded on a Agilent-400 MHz and are reported in ppm using chloroform as the internal standard (77.0 ppm). Mass spectra were recorded on Agilent mass spectrum

**General Procedure for the oxidative desulfurative cyclization of dithioesters :** To a solution of dithioester (1.0 eq, 1.0 mmol) in THF (2 mL) was added amine or hydrazine (1.1 eq, 1.1 mmol) at room temperature, the resulting mixture was stirred for 45 min. monitored the dithioester could no longer be detected. To the above mixture was added T3P (1.0 equiv, 50% solution in EtOAc) and DMSO (2.0 eq). The mixture was stirred at room temperature for 1.5 h and progress was monitored by TLC. The reaction mixture was diluted with EtOAc neutralized with saturated sodium bicarbonate solution, separated organic layer; the aqueous layer was extracted with EtOAc (25 mL X 3). The combined organic layers were washed with water, dried over anhydrous Na<sub>2</sub>SO<sub>4</sub>. The solvent was removed under reduced pressure; the residue was purified by silica gel chromatography.

**General Procedure for the synthesis of dithioesters (phenyl dithioester) :** Magnesium (1.2 eq, 1.2 mmol) was added to THF (2ml) and the solution was warmed till the brisk effervescence observed. After the activation of magnesium, the solution was ice cooled and solution of bromo benzene (1.0 eq, 1.0 mmol) was added drop wise. Then the solution was stirred for 20 min at room temperature and then carbon disulphide (1.0 eq, 1.0 mmol) was added drop wise (the solution turns to orange color) under ice cooled condition. The reaction mixture was stirred for 2 h at room temperature. Methyl iodide (1.0 eq, 1.0 mmol) was added drop wise under ice cooled condition and the mixture was stirred at room temperature for 3 h and progress was monitored by TLC. Ice cold water was added slowly and then reaction mixture was diluted with hexane; the aqueous layer

was extracted with hexane (25 mL X 3). The combined organic layers were washed with water, dried over anhydrous  $\text{Na}_2\text{SO}_4$ . The solvent was removed under reduced pressure; the residue was purified by silica gel chromatography.

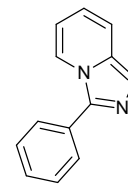

<sup>1</sup>H NMR of 3a

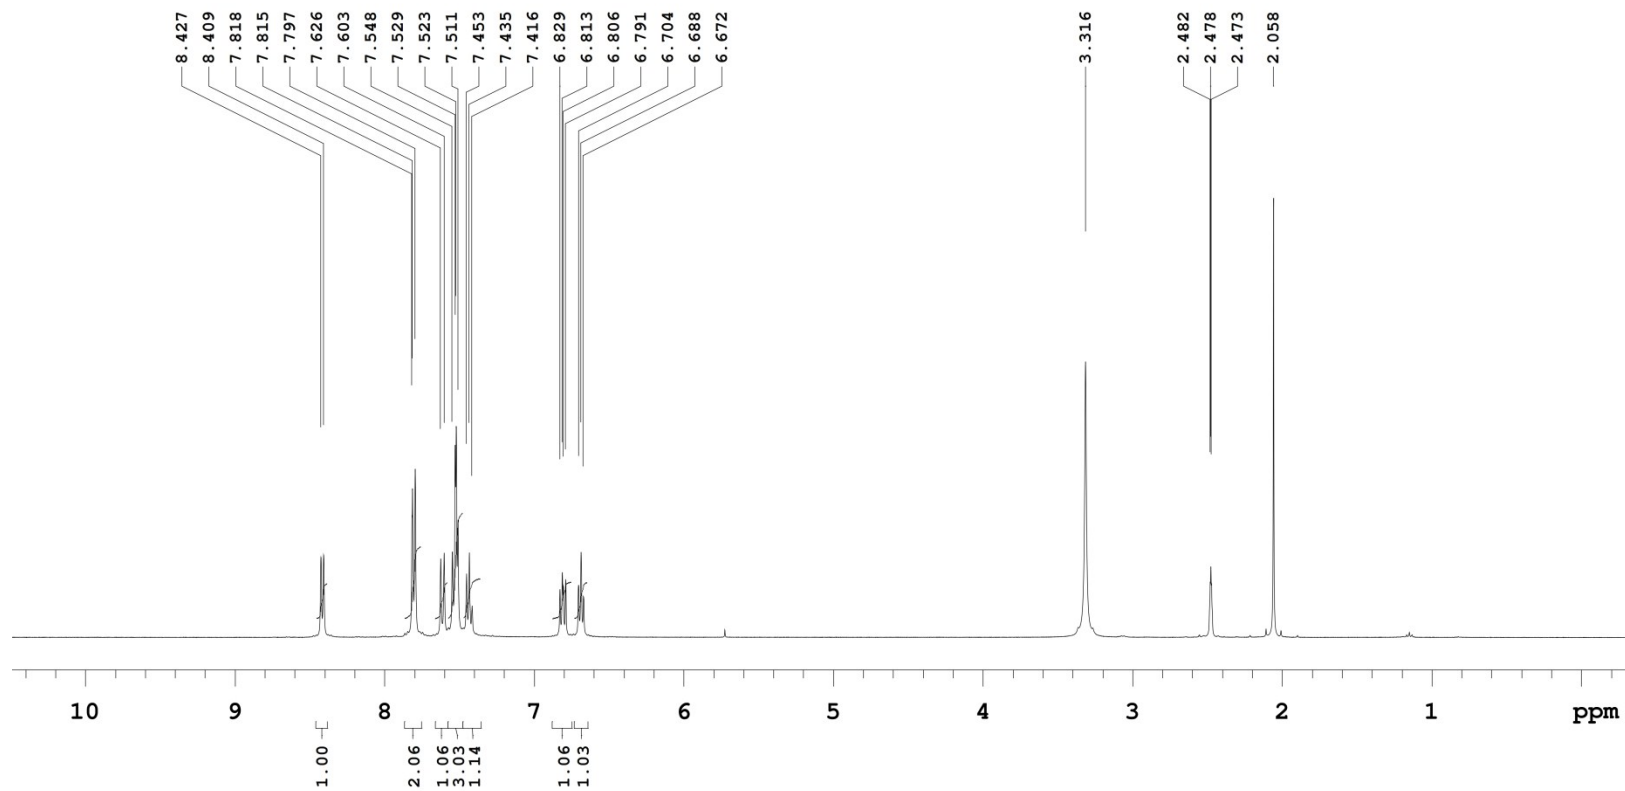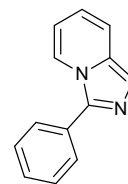

**<sup>13</sup>C NMR of 3a**

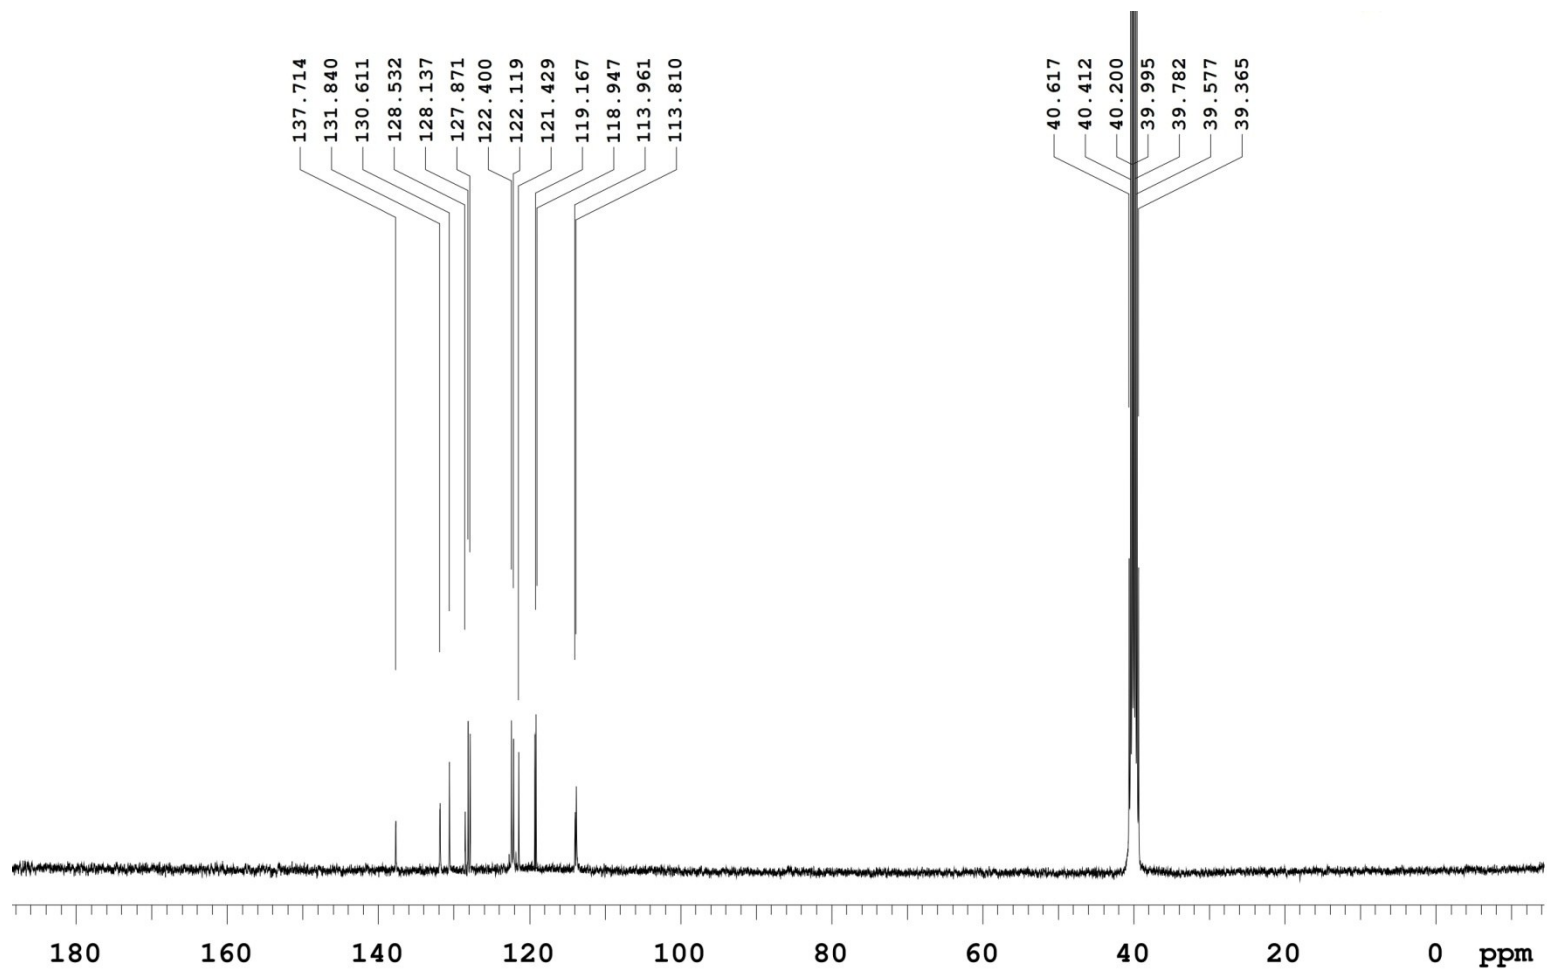

**<sup>1</sup>H NMR of 3b**

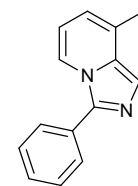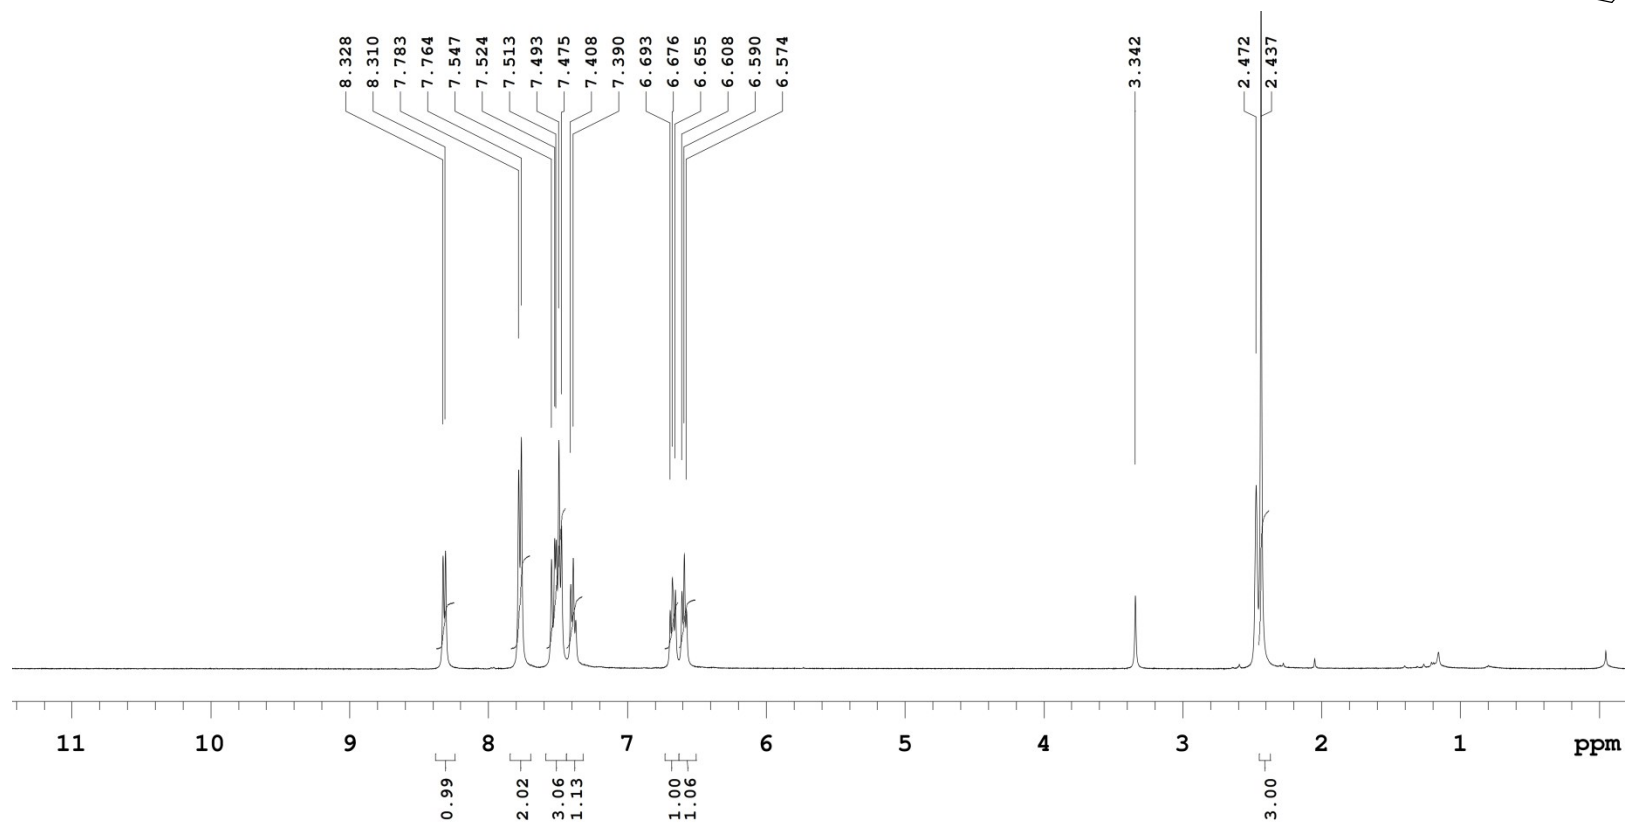

**<sup>13</sup>C NMR of 3b**

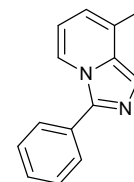

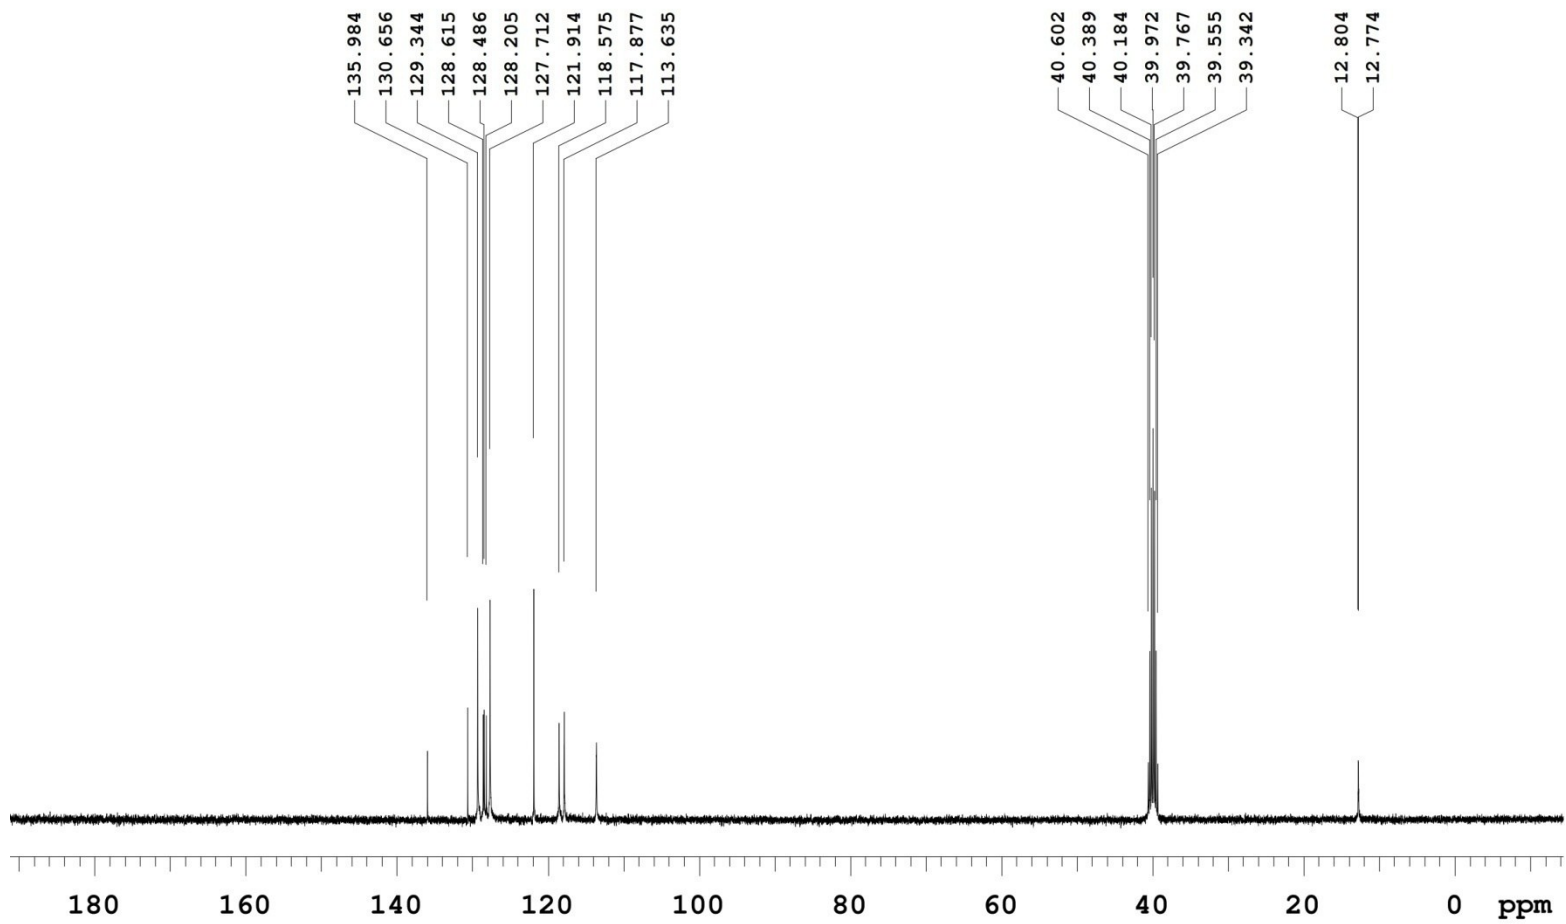

S7

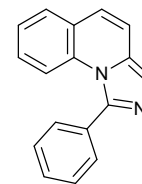

**<sup>1</sup>H NMR of 3c**

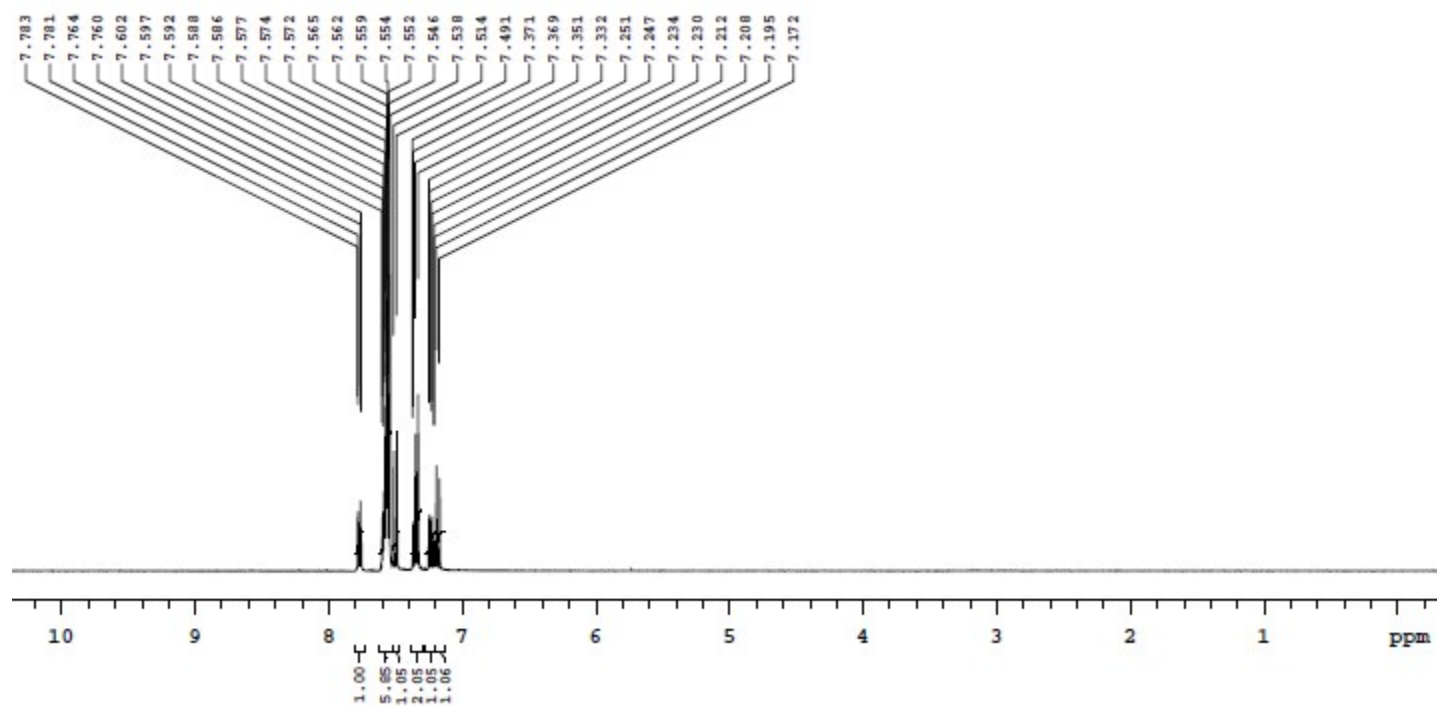

**<sup>13</sup>C NMR of 3c**

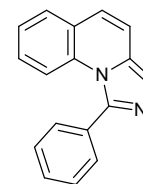



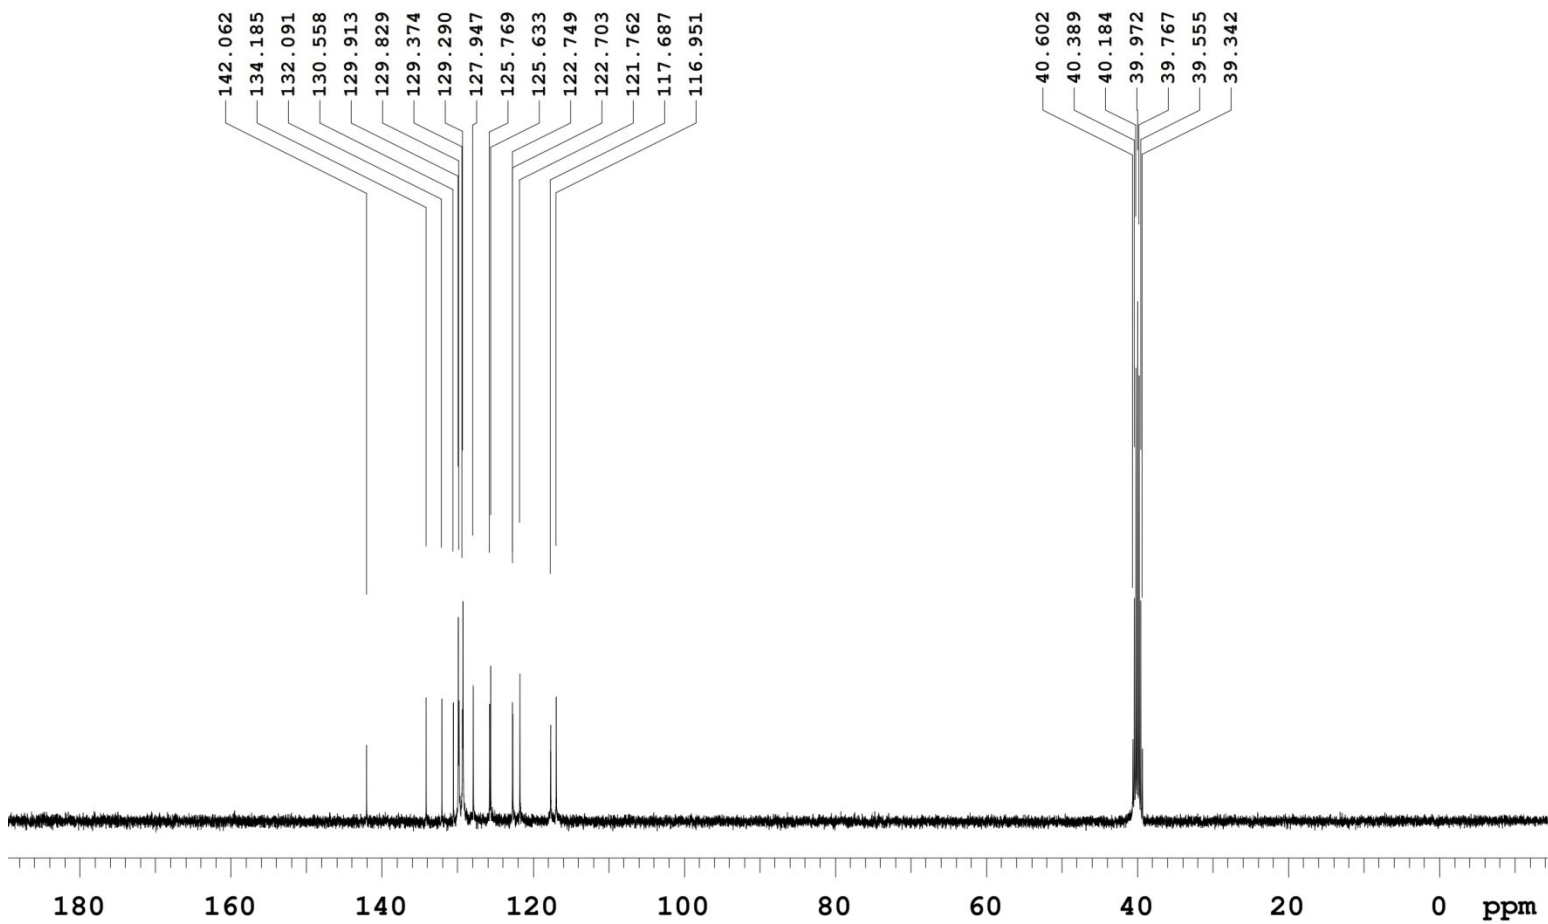

<sup>13</sup>C NMR of 3d

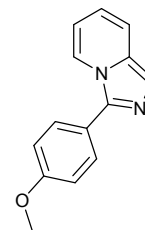

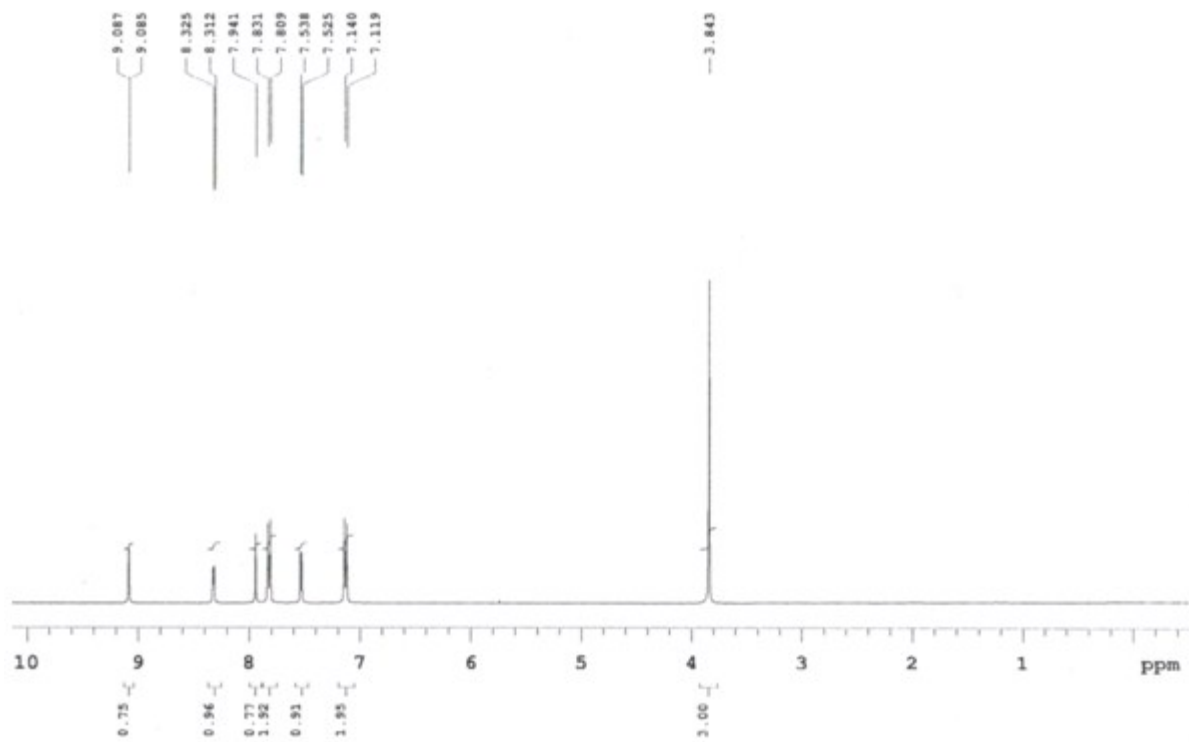

**<sup>13</sup>C NMR of 3d**

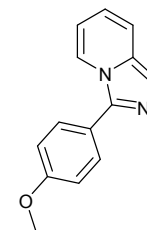

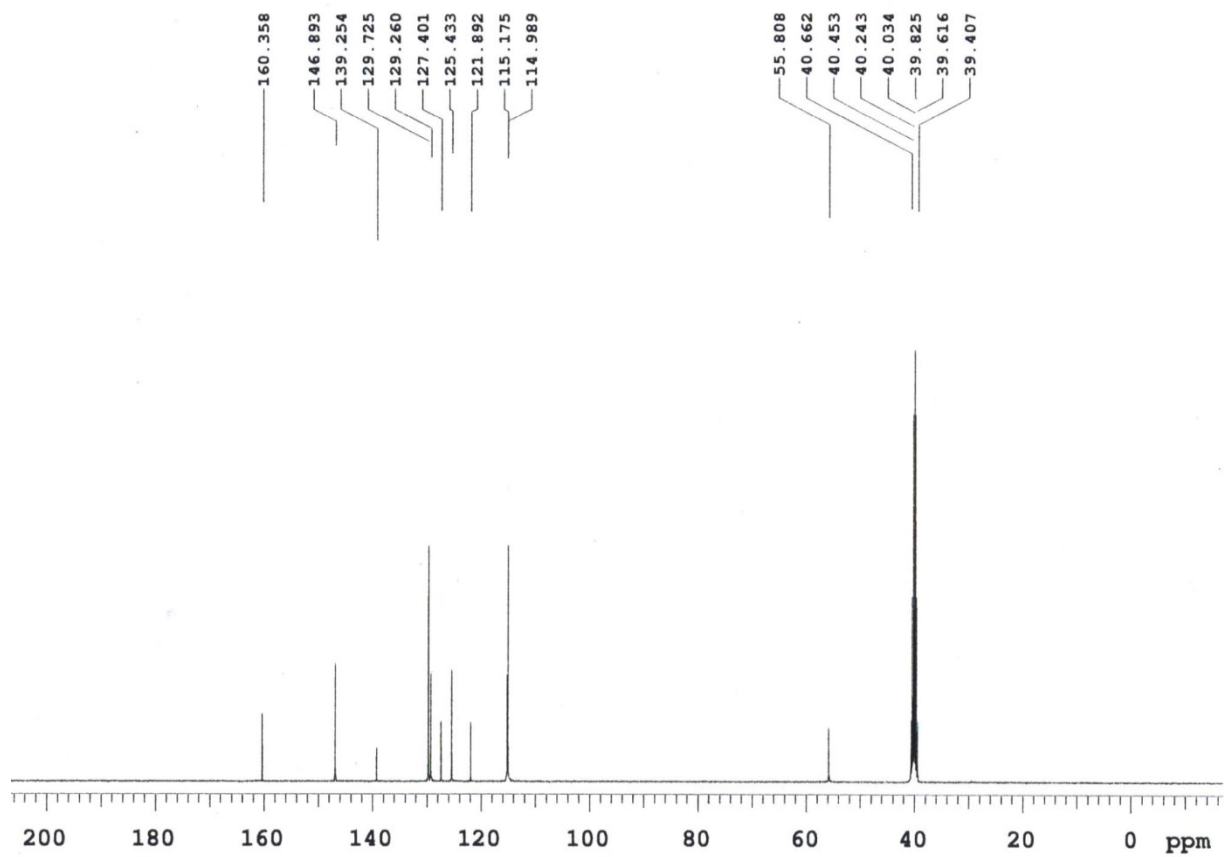

<sup>1</sup>H NMR of 3e

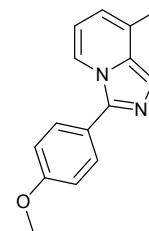

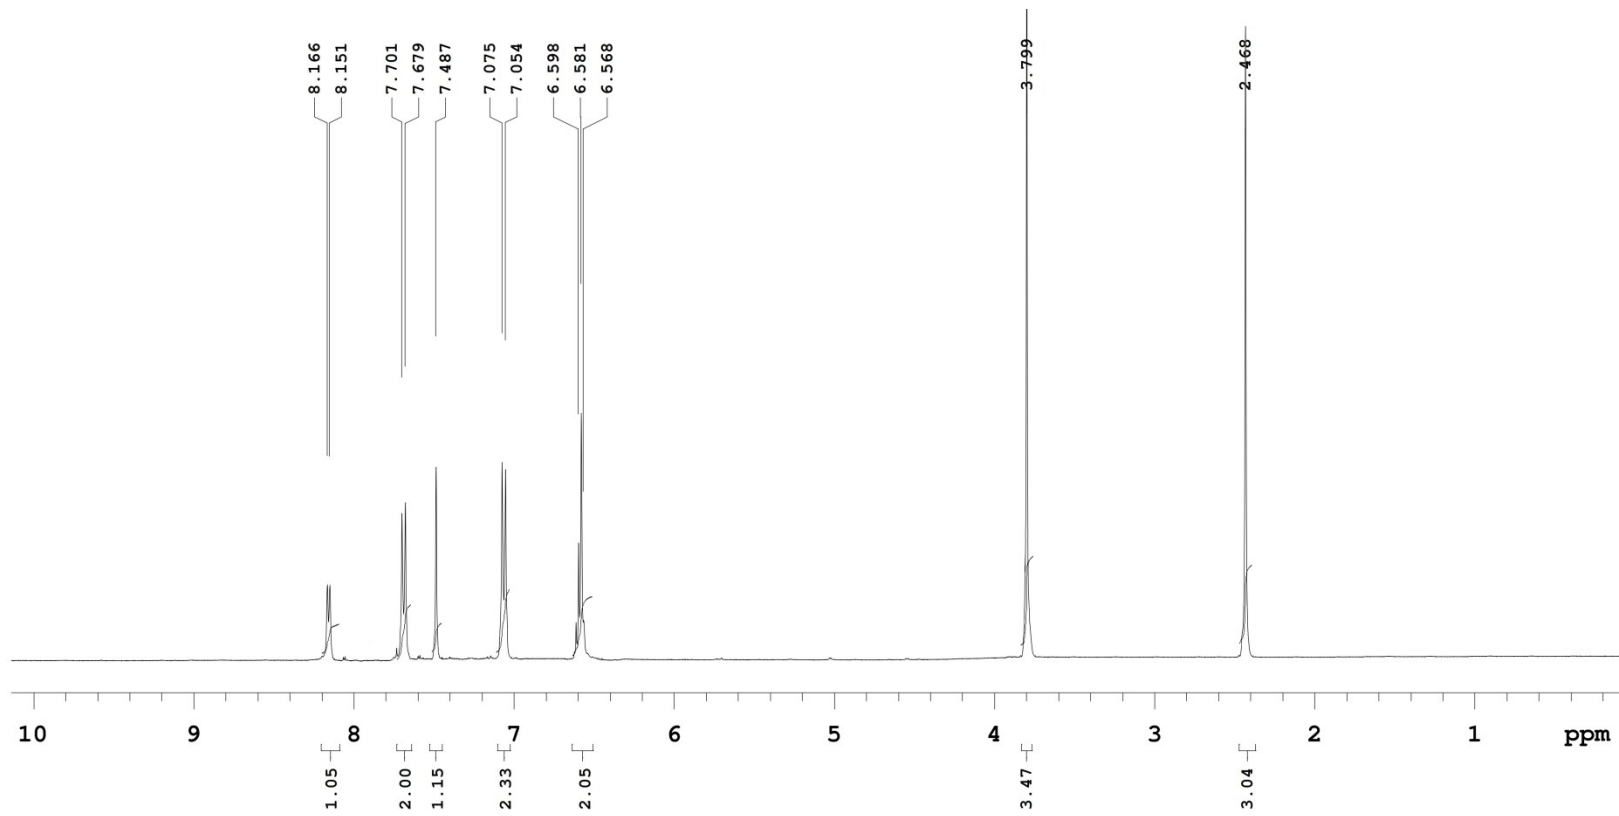

<sup>13</sup>C NMR of 3e

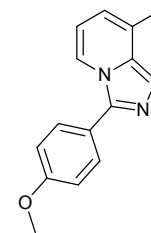

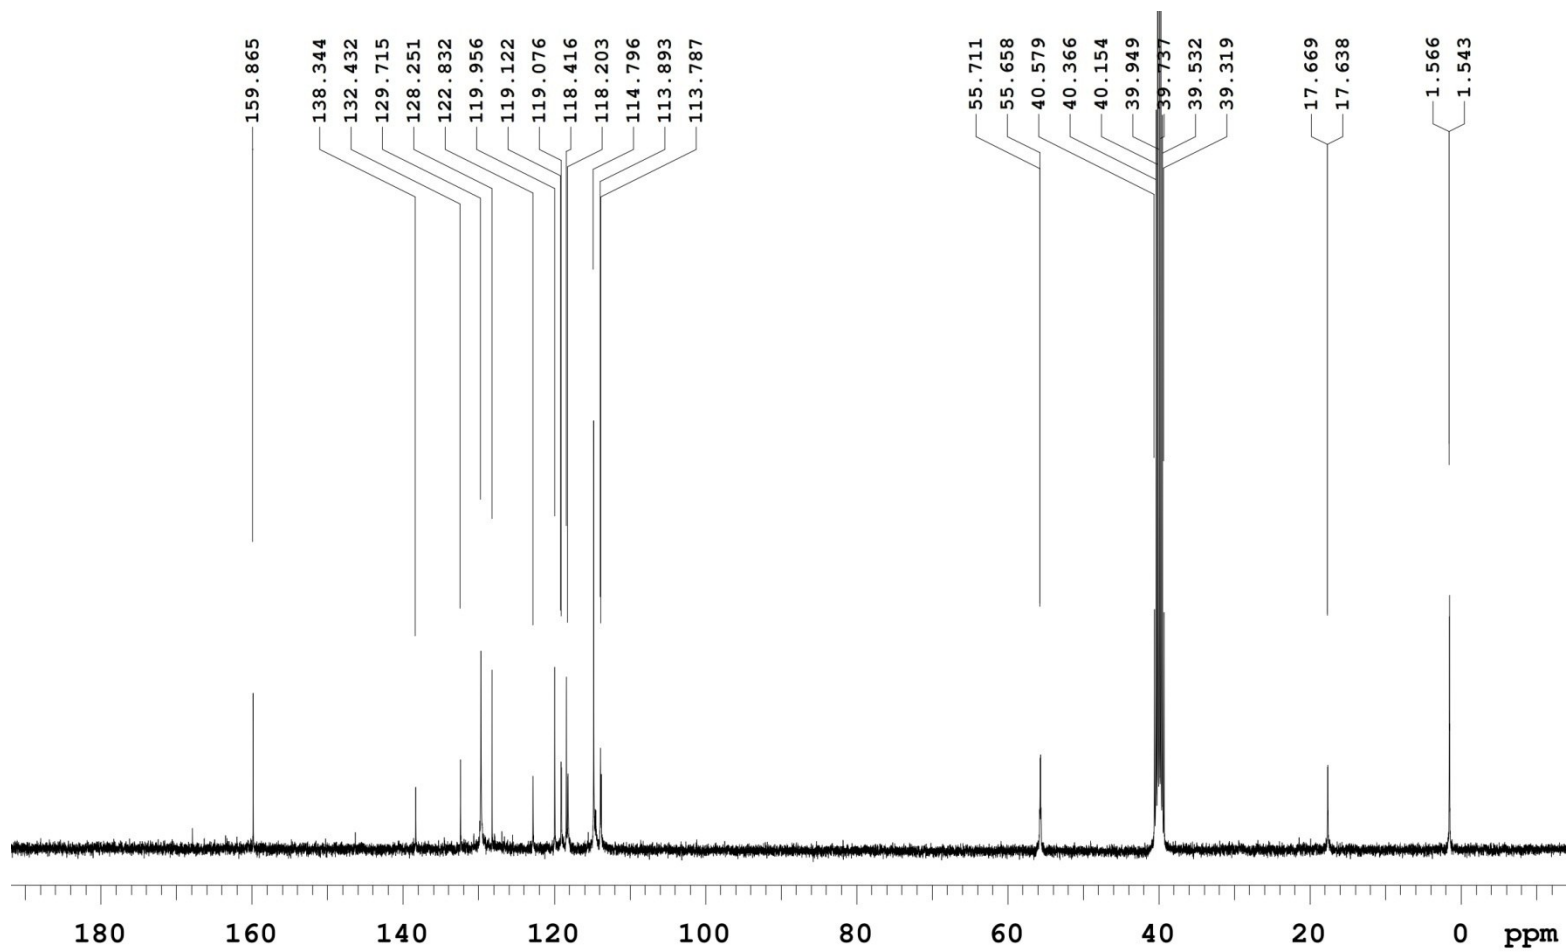

<sup>1</sup>H NMR of 3f

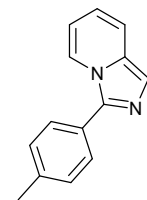

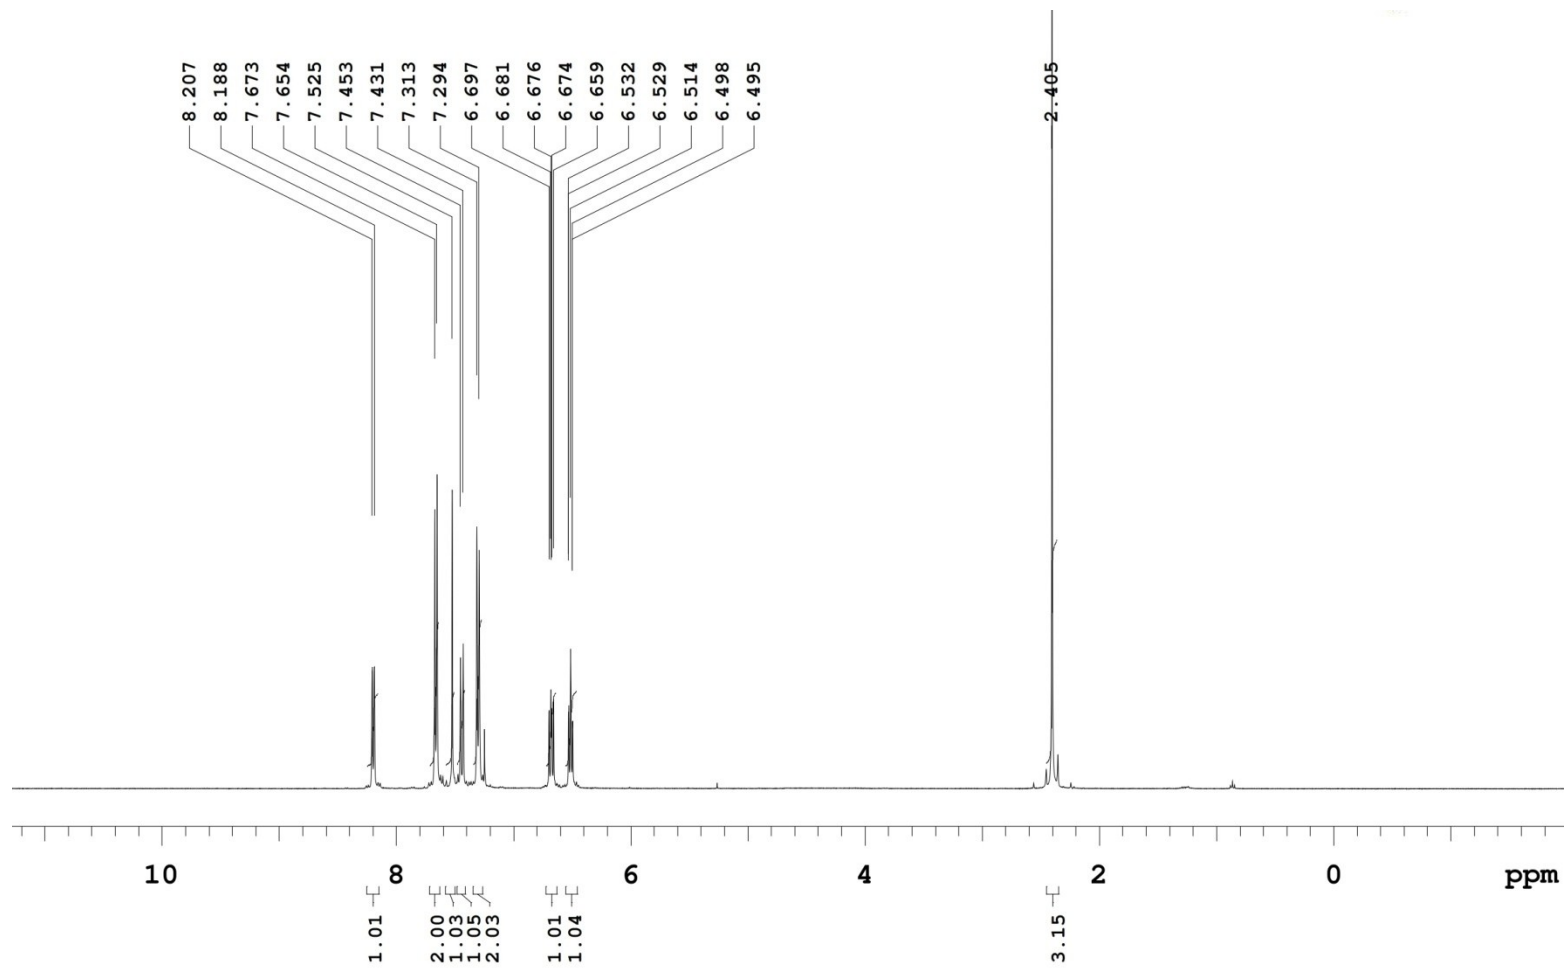

<sup>13</sup>C NMR of 3f

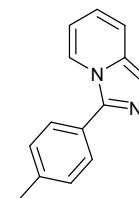

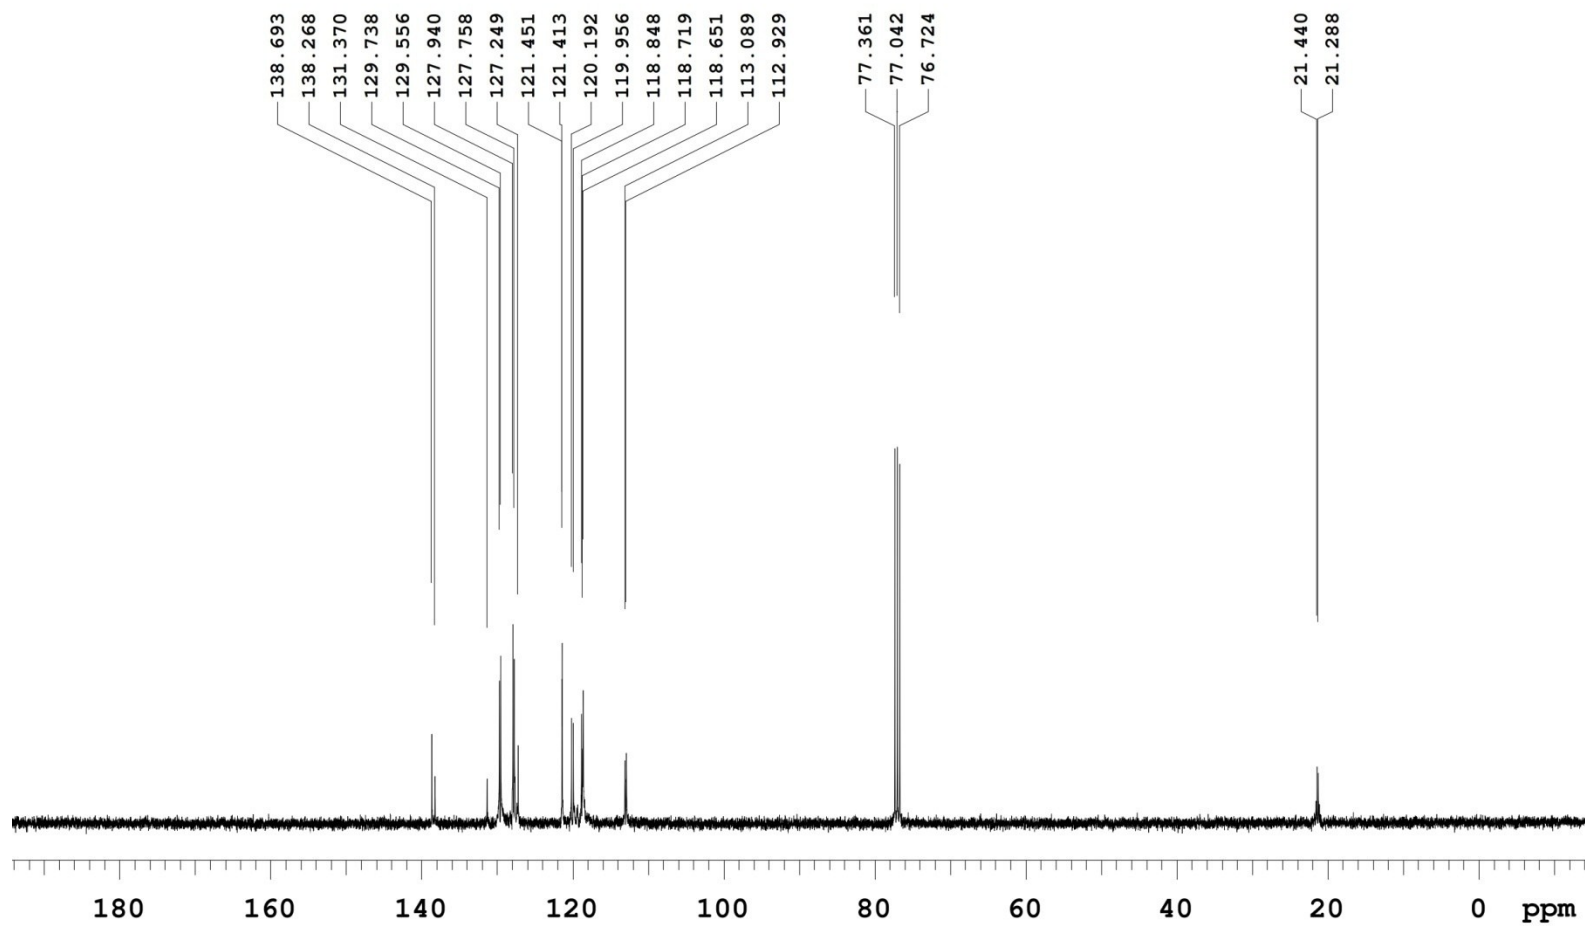

<sup>13</sup>C NMR of 3g

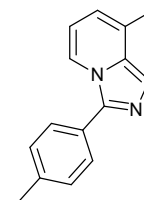

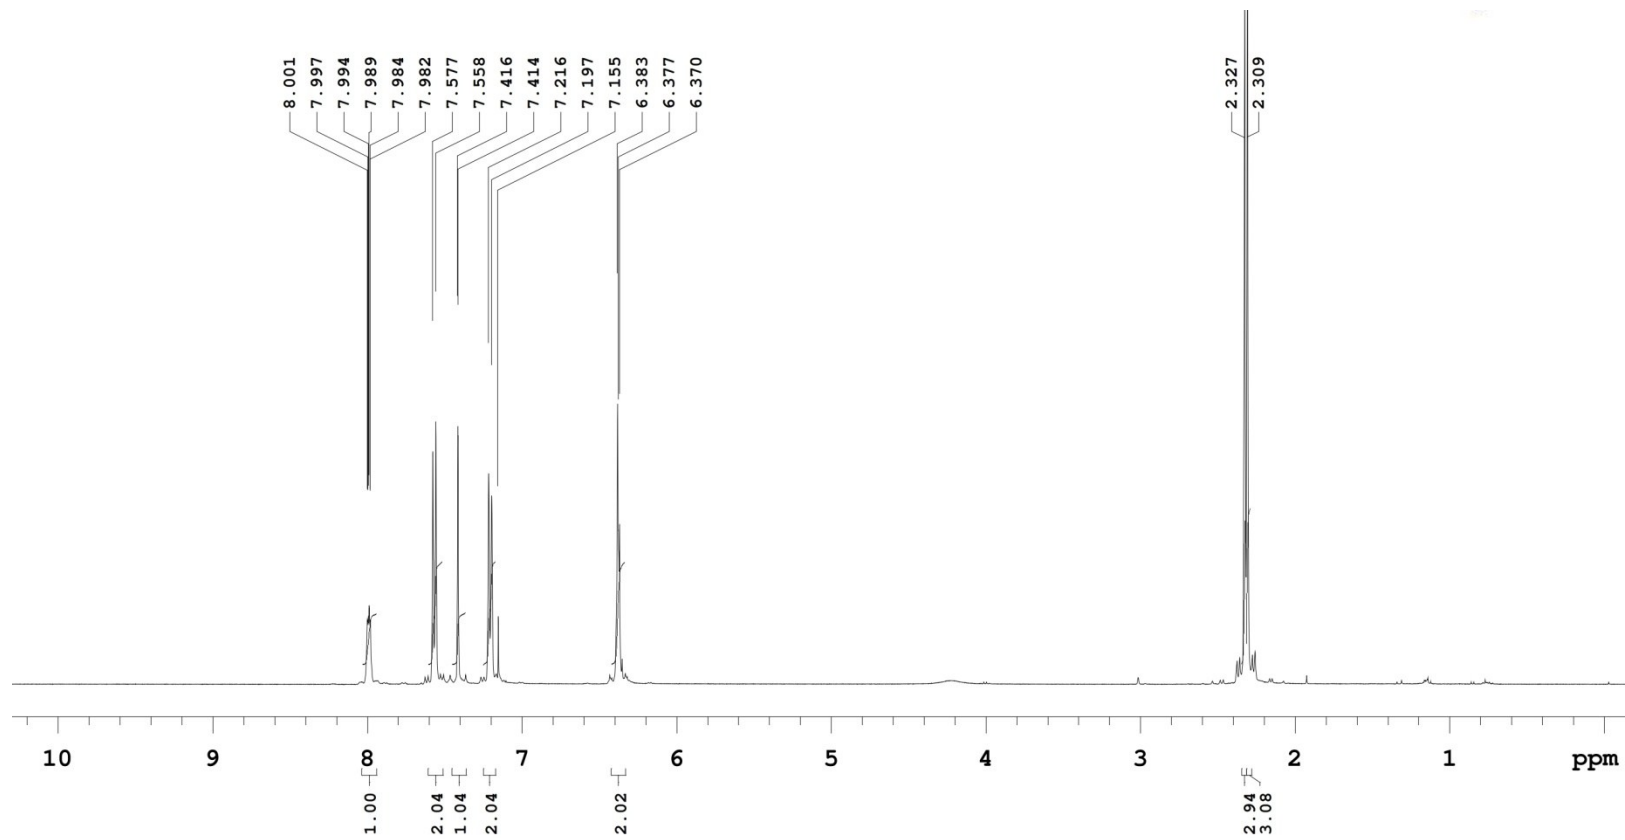

<sup>13</sup>C NMR of 3g

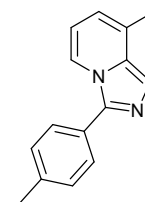



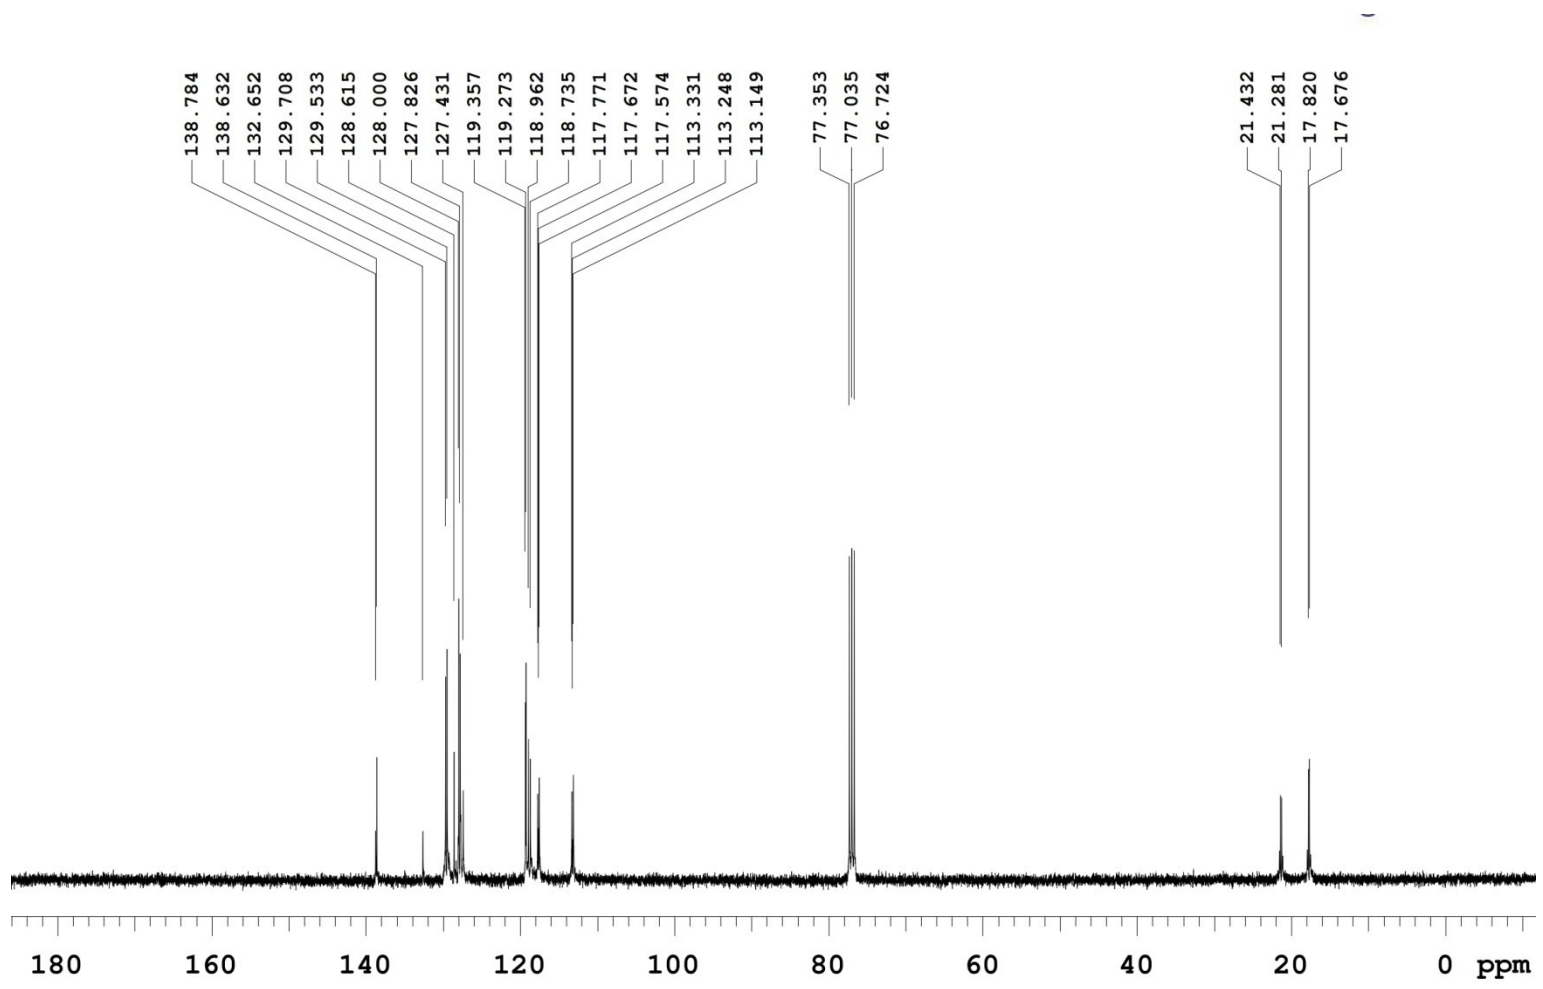

<sup>13</sup>C NMR of 3h

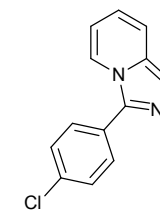

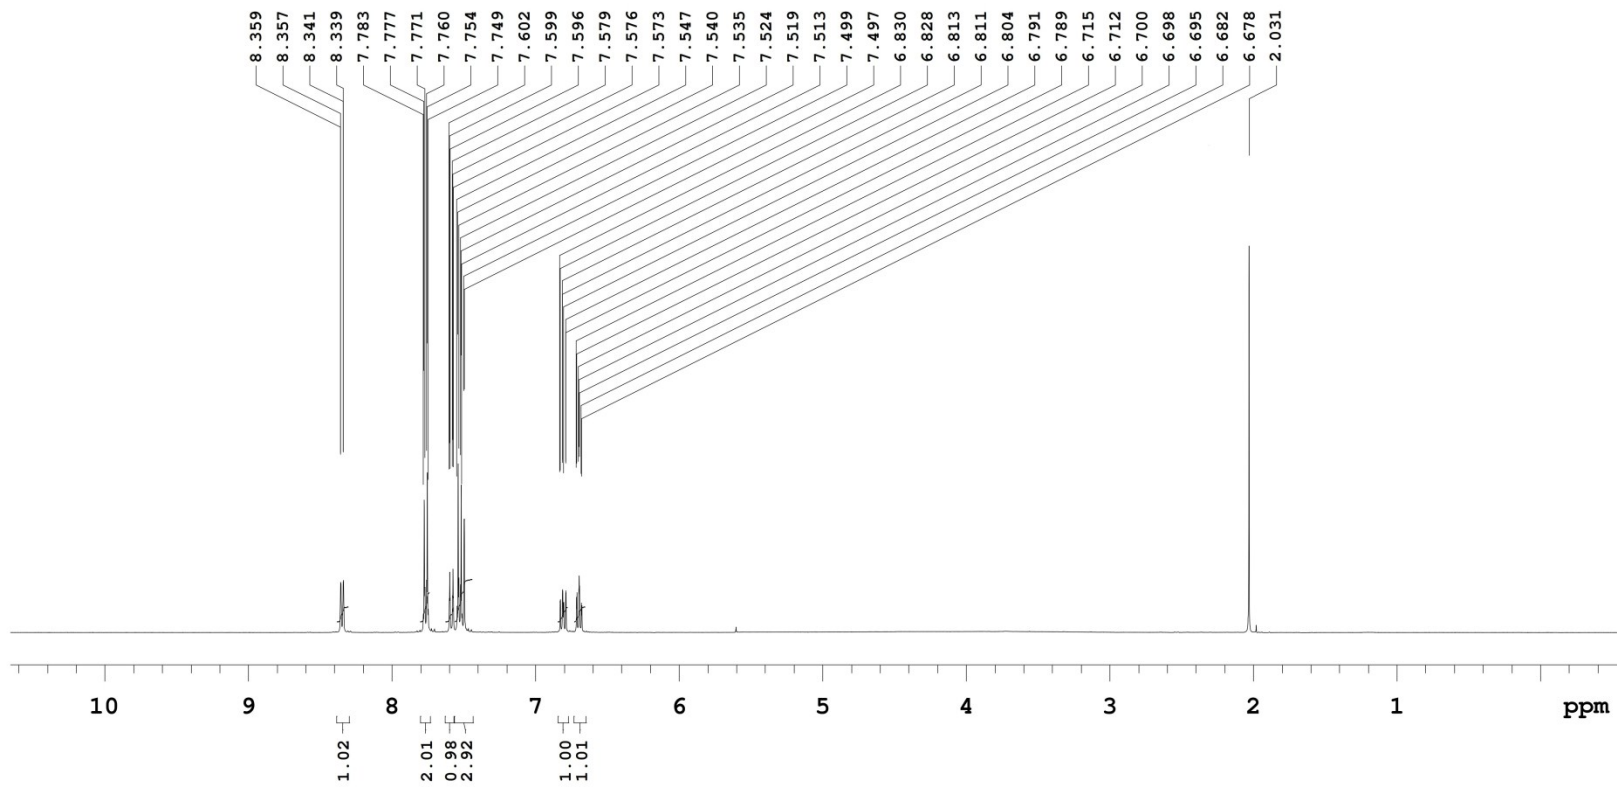

**<sup>13</sup>C NMR of 3h**

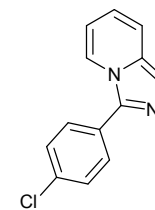

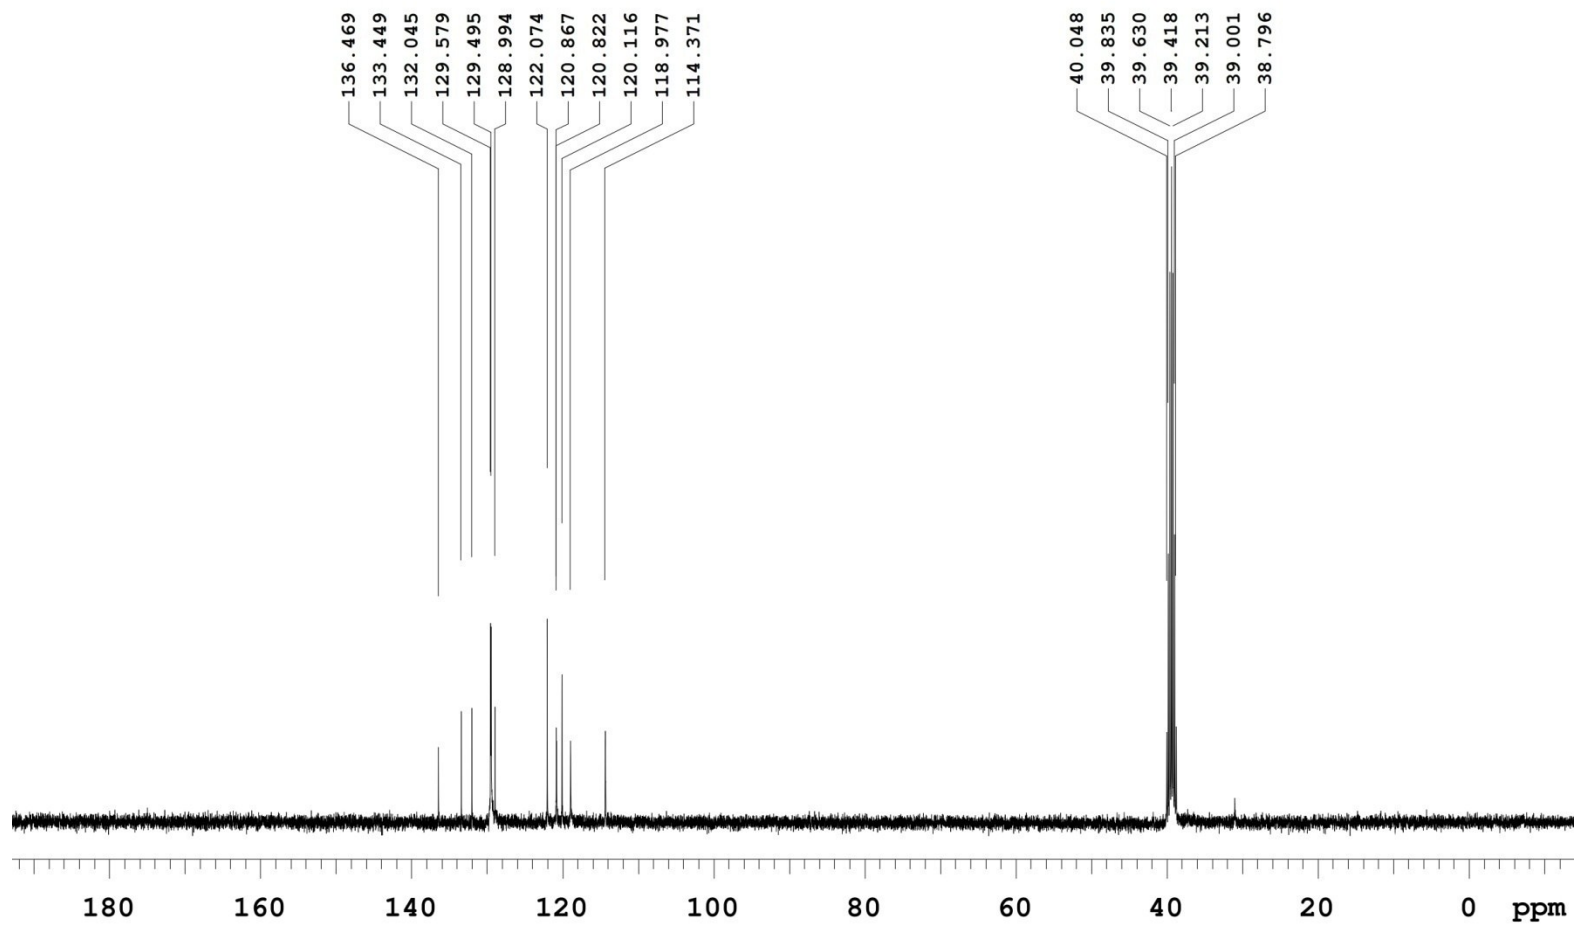

<sup>1</sup>H NMR of 3j

S19

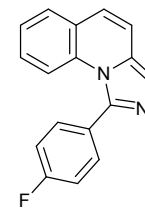

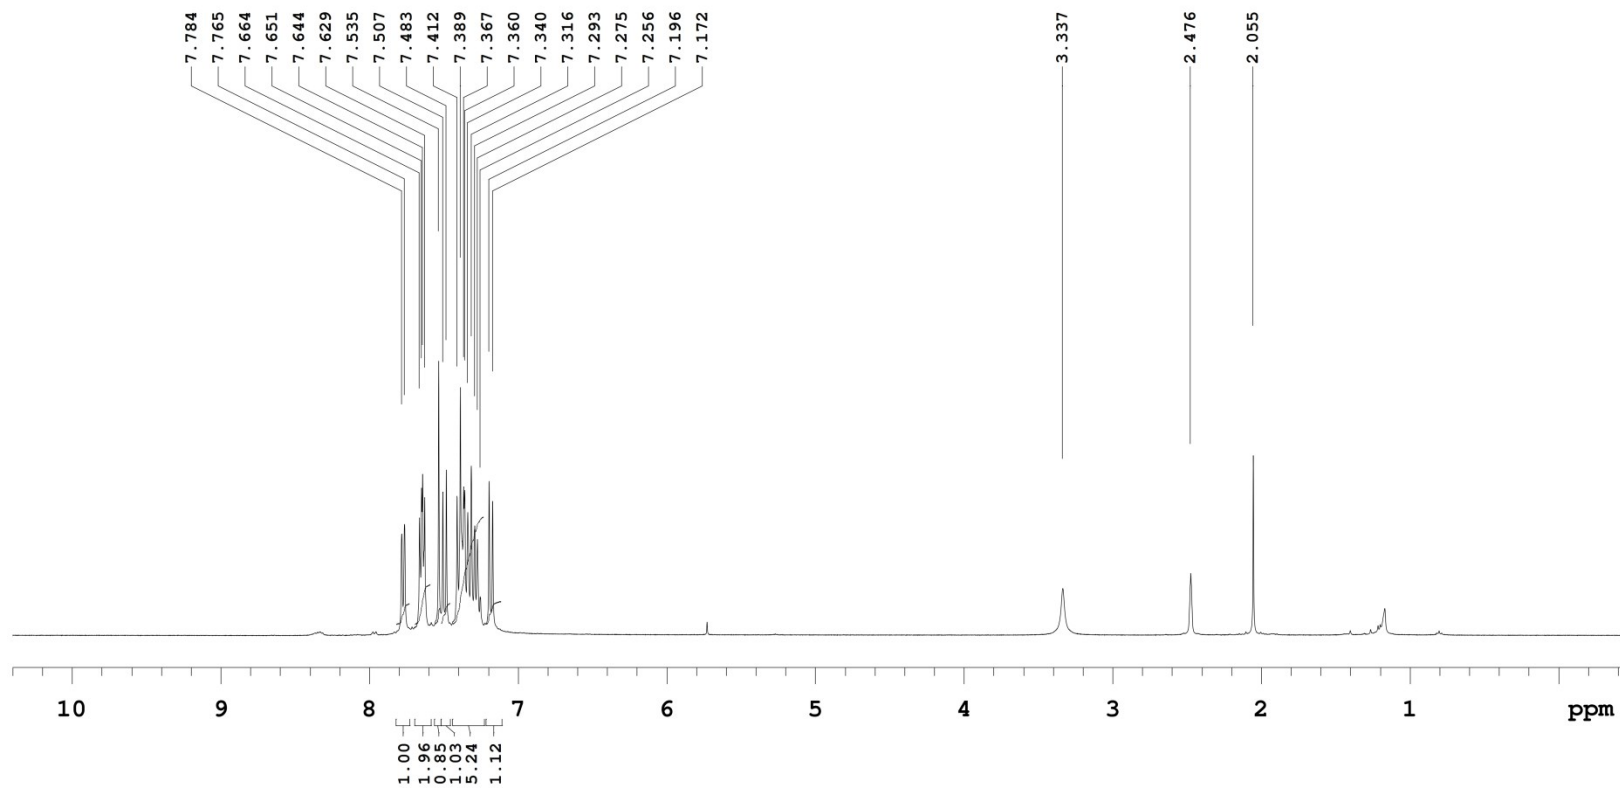

**<sup>13</sup>C NMR of 3j**

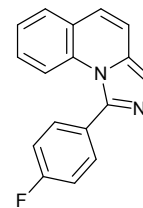

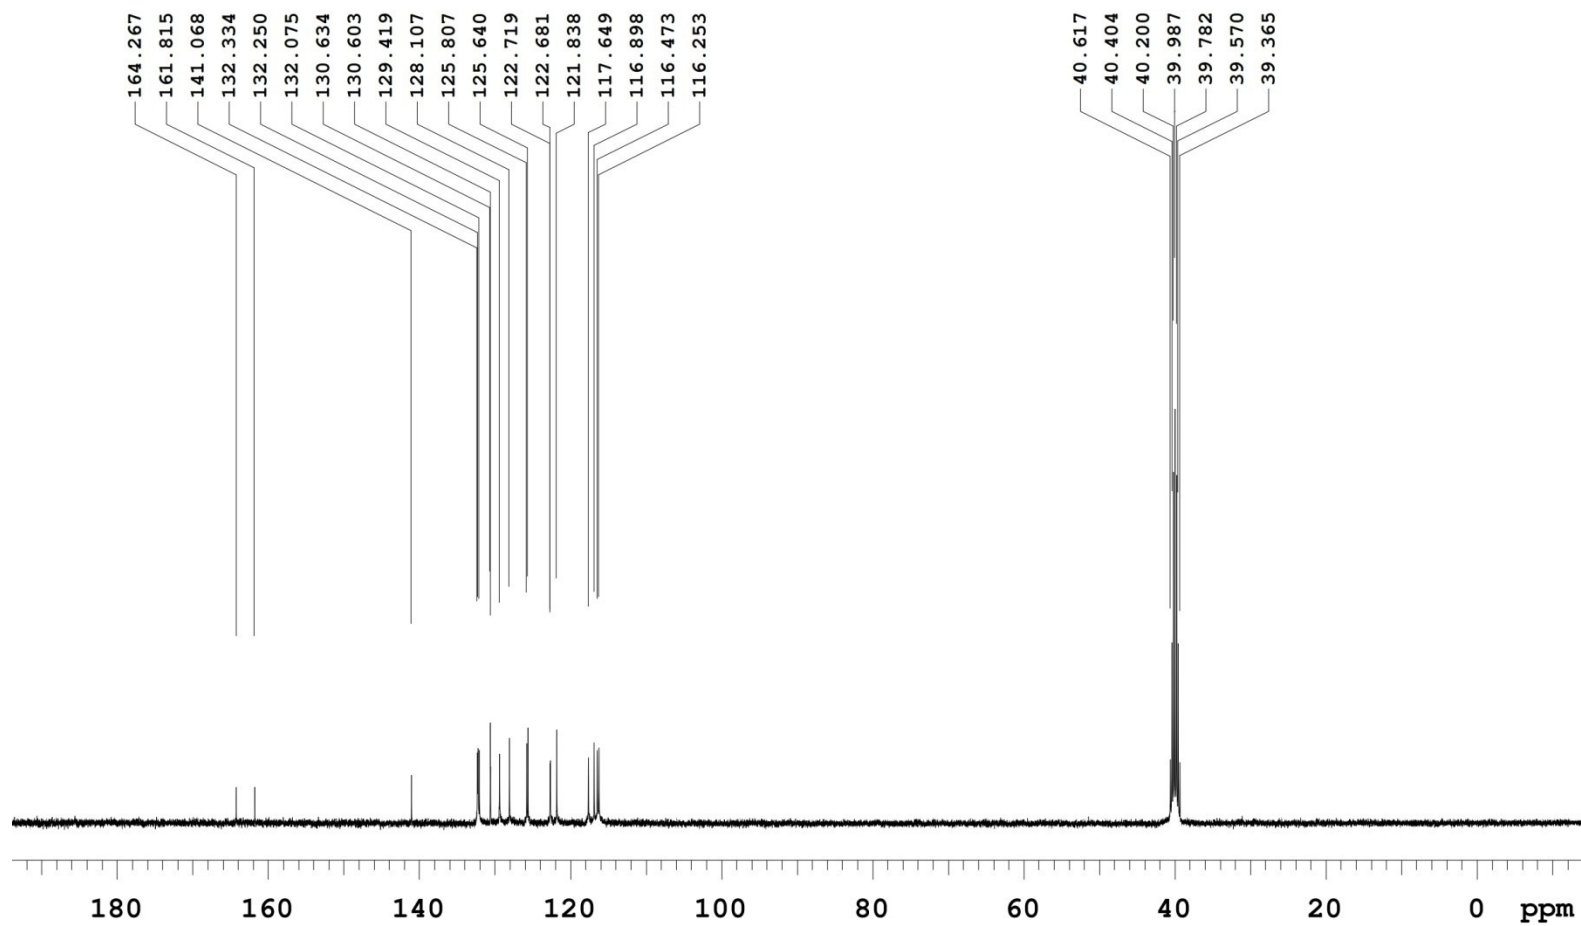

<sup>1</sup>H NMR of 3k

S21

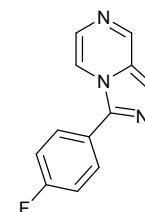

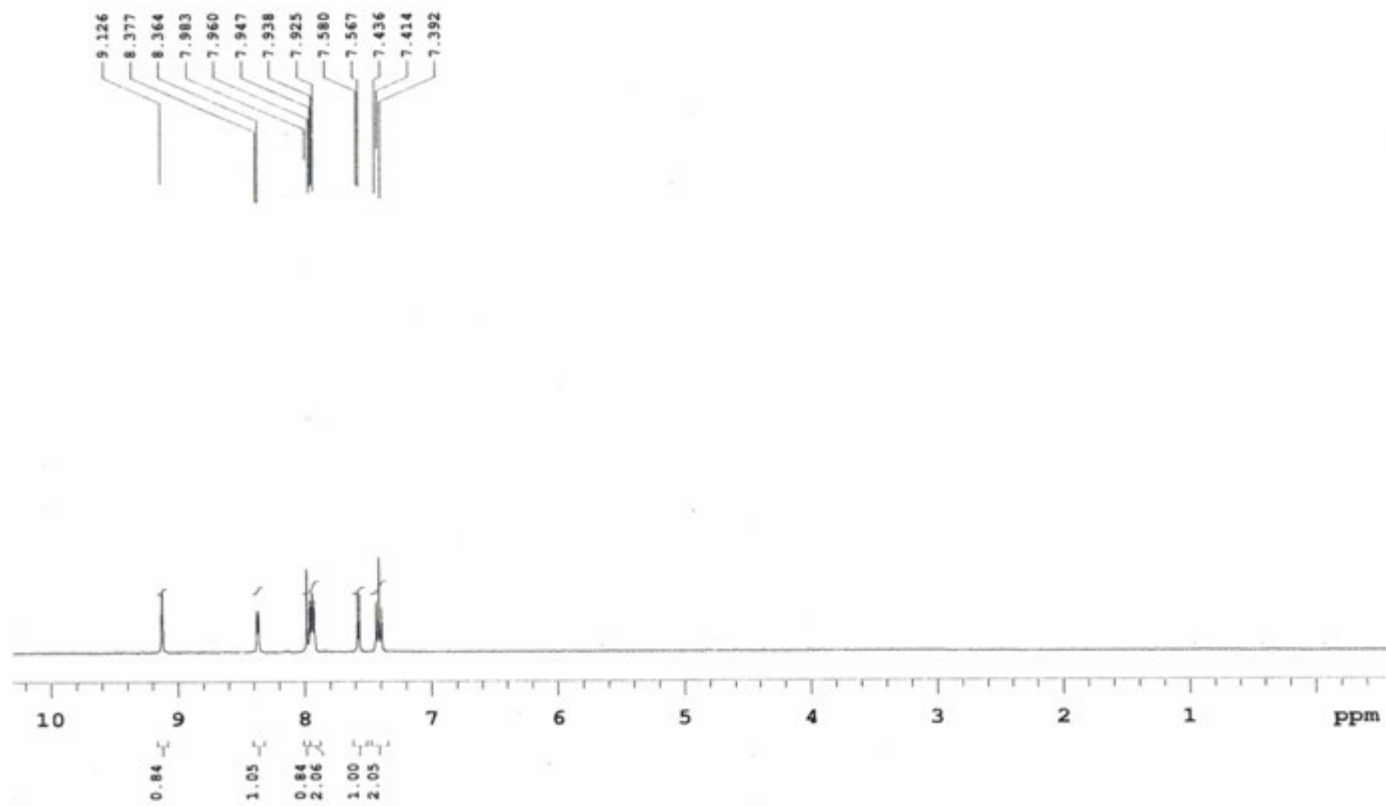

<sup>13</sup>C NMR of 3k

S22

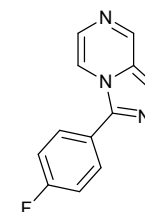

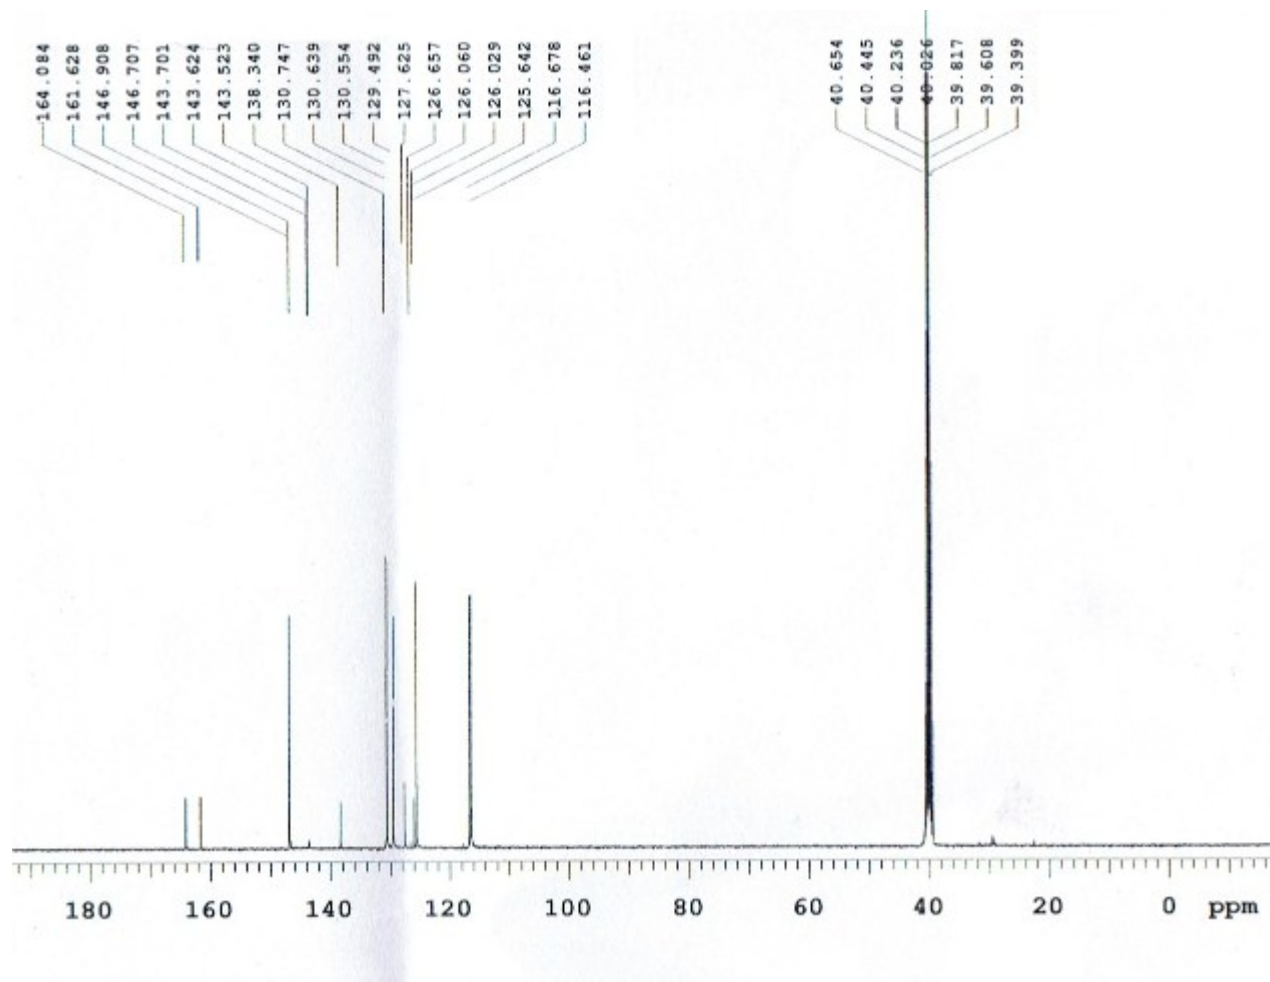

<sup>1</sup>H NMR of 3i

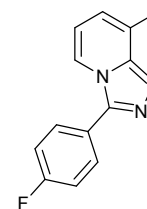

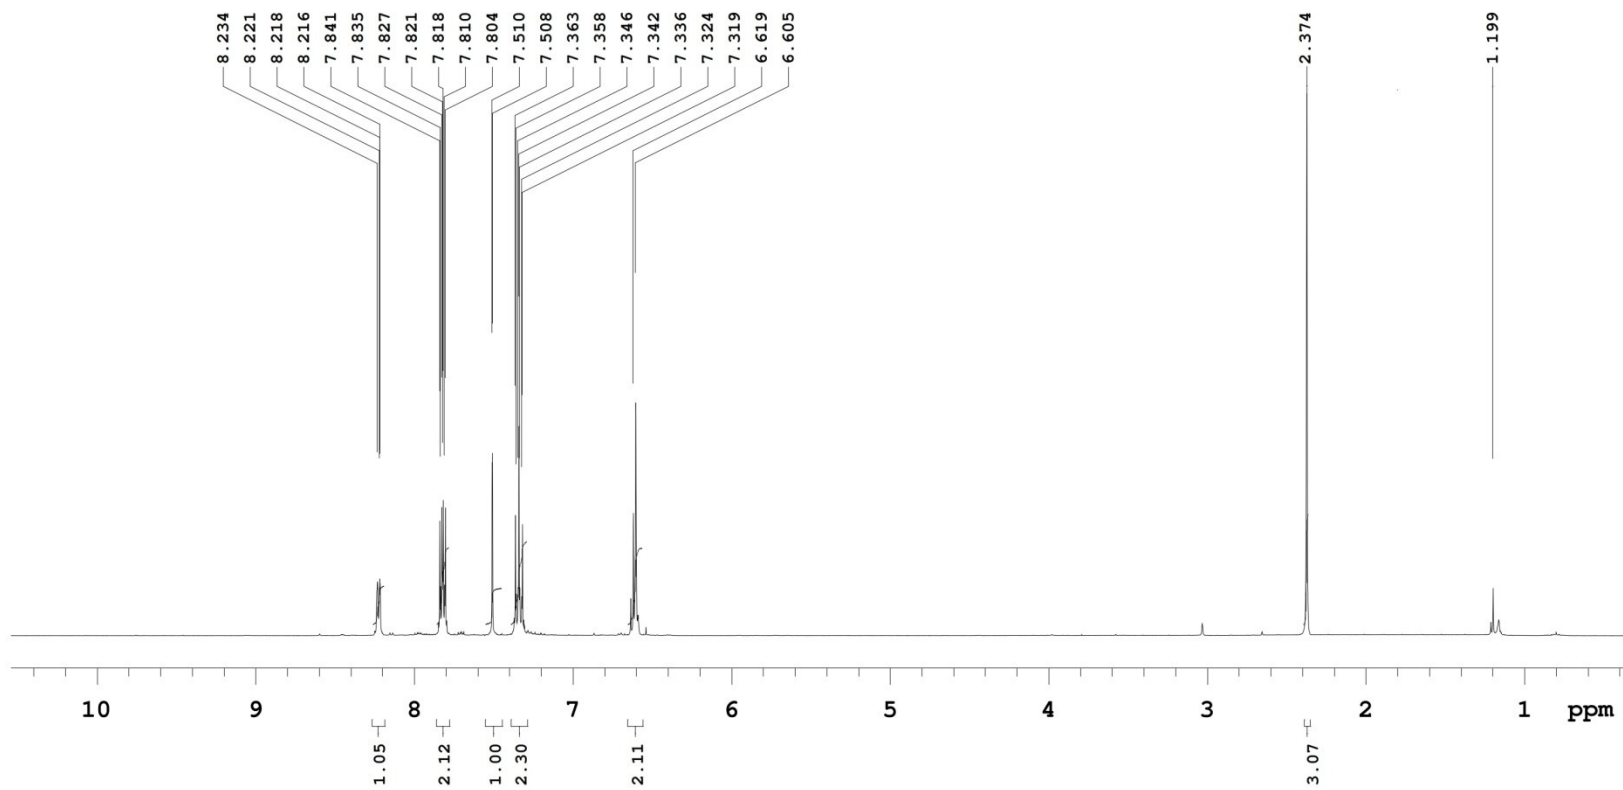

<sup>13</sup>C NMR of 3i

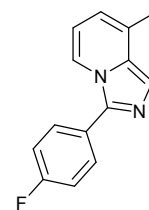



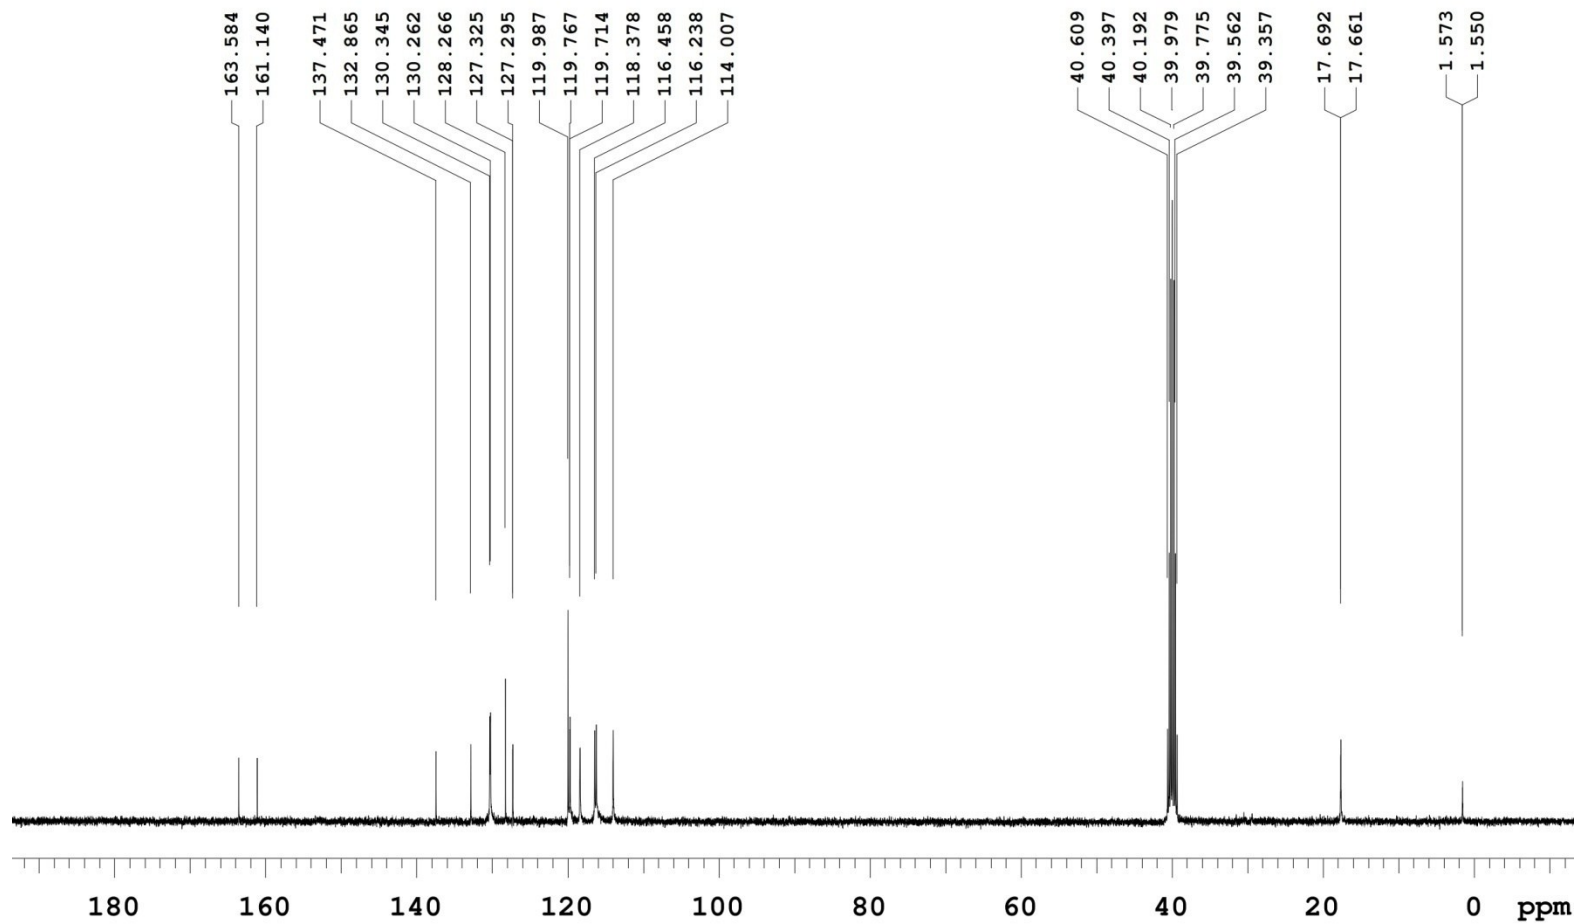

<sup>13</sup>C NMR of 3l

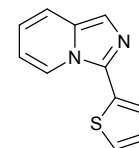

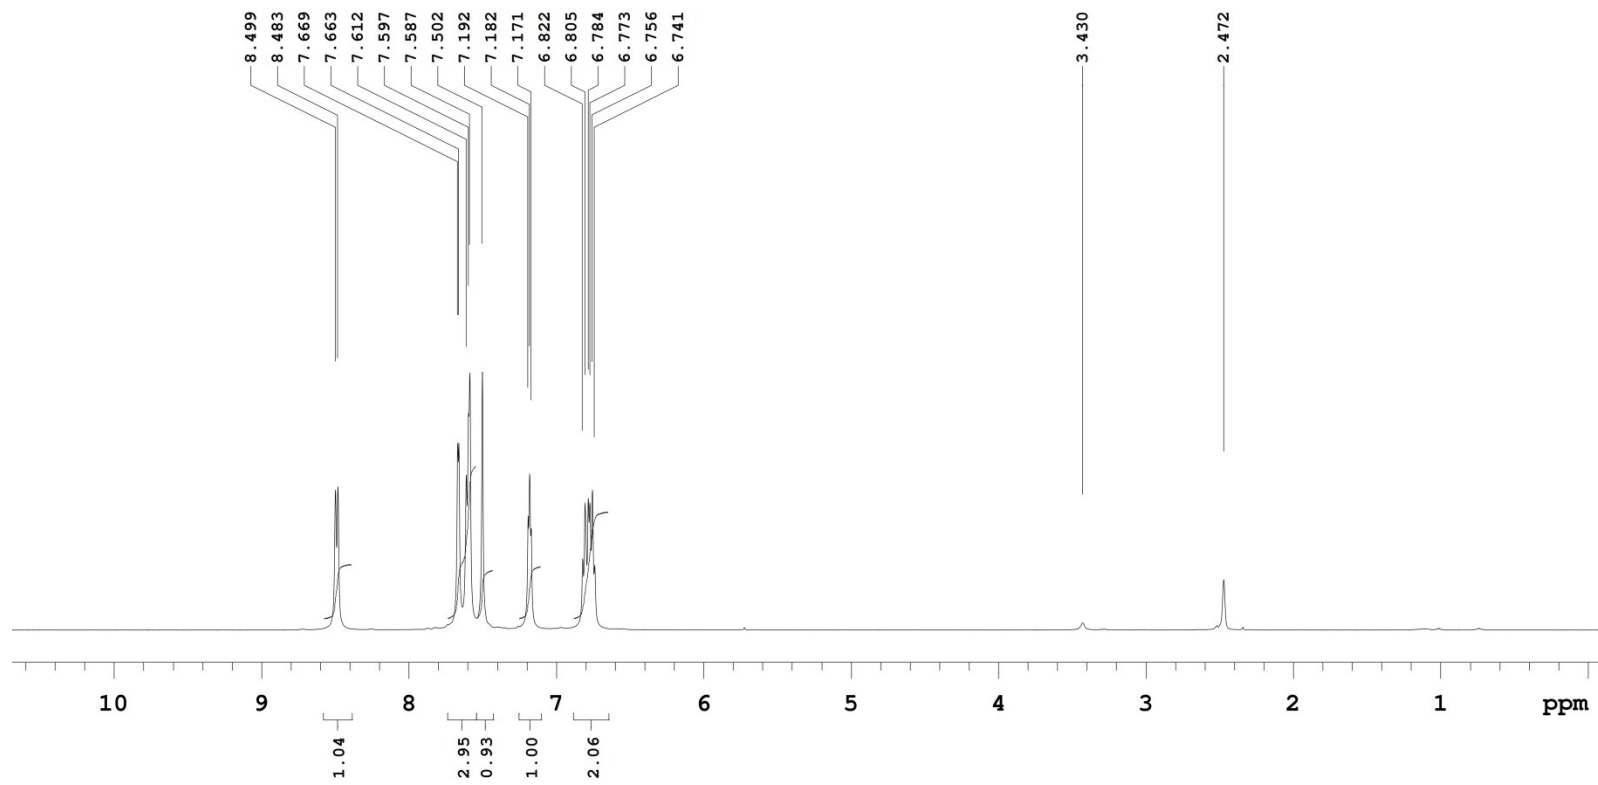

<sup>13</sup>C NMR of 3I

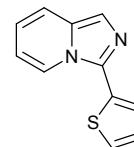

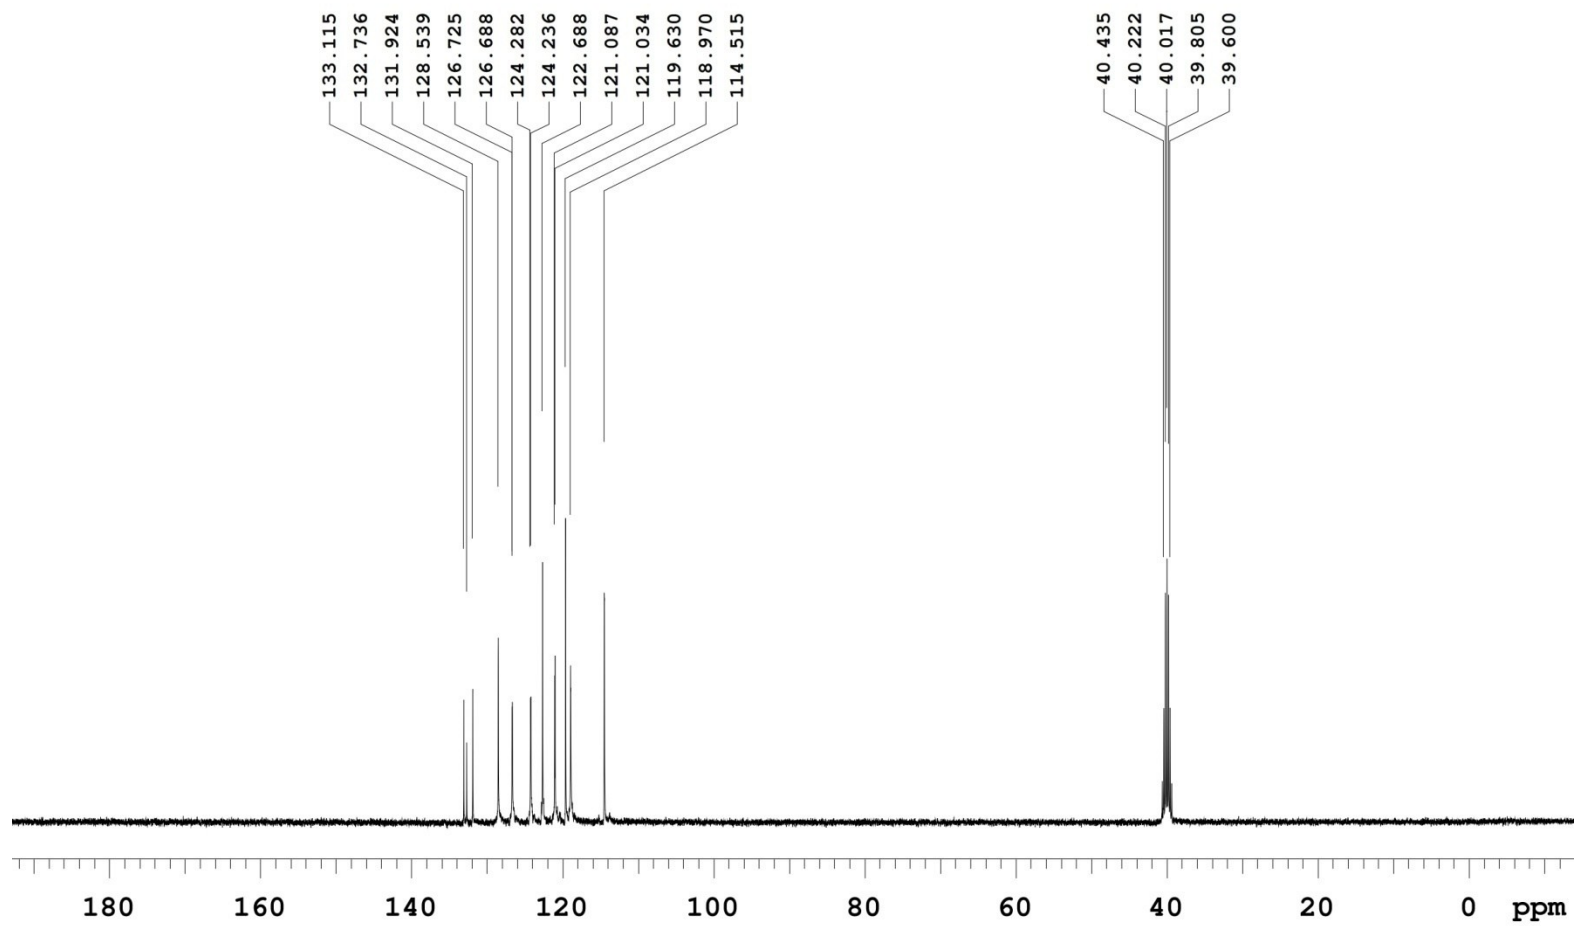

<sup>13</sup>C NMR of 3m

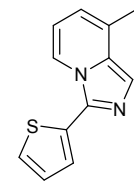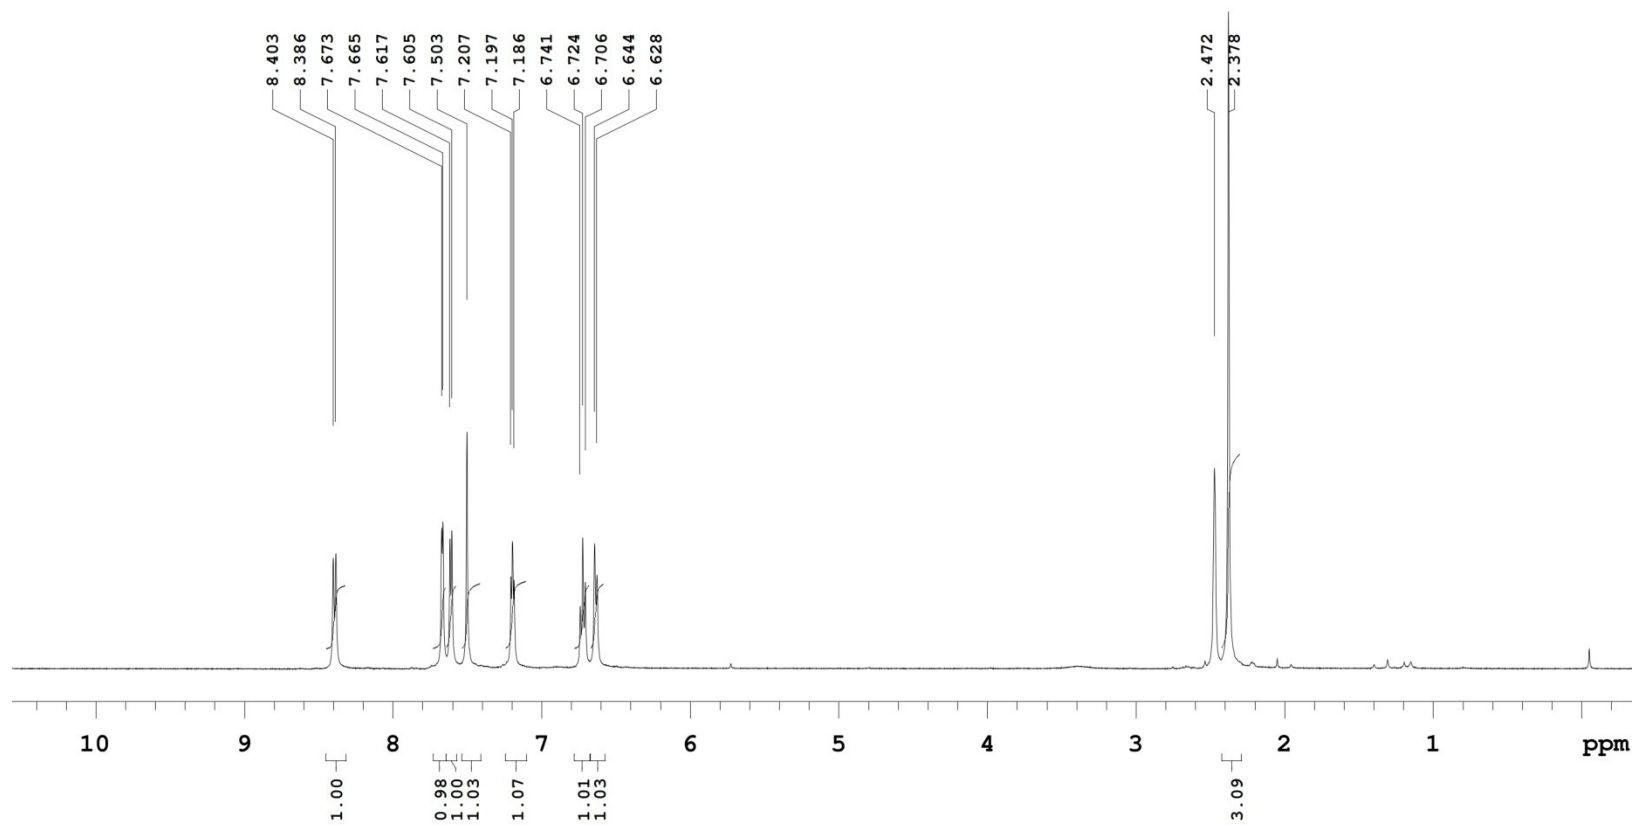

**<sup>13</sup>C NMR of 3m**

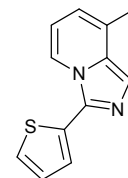

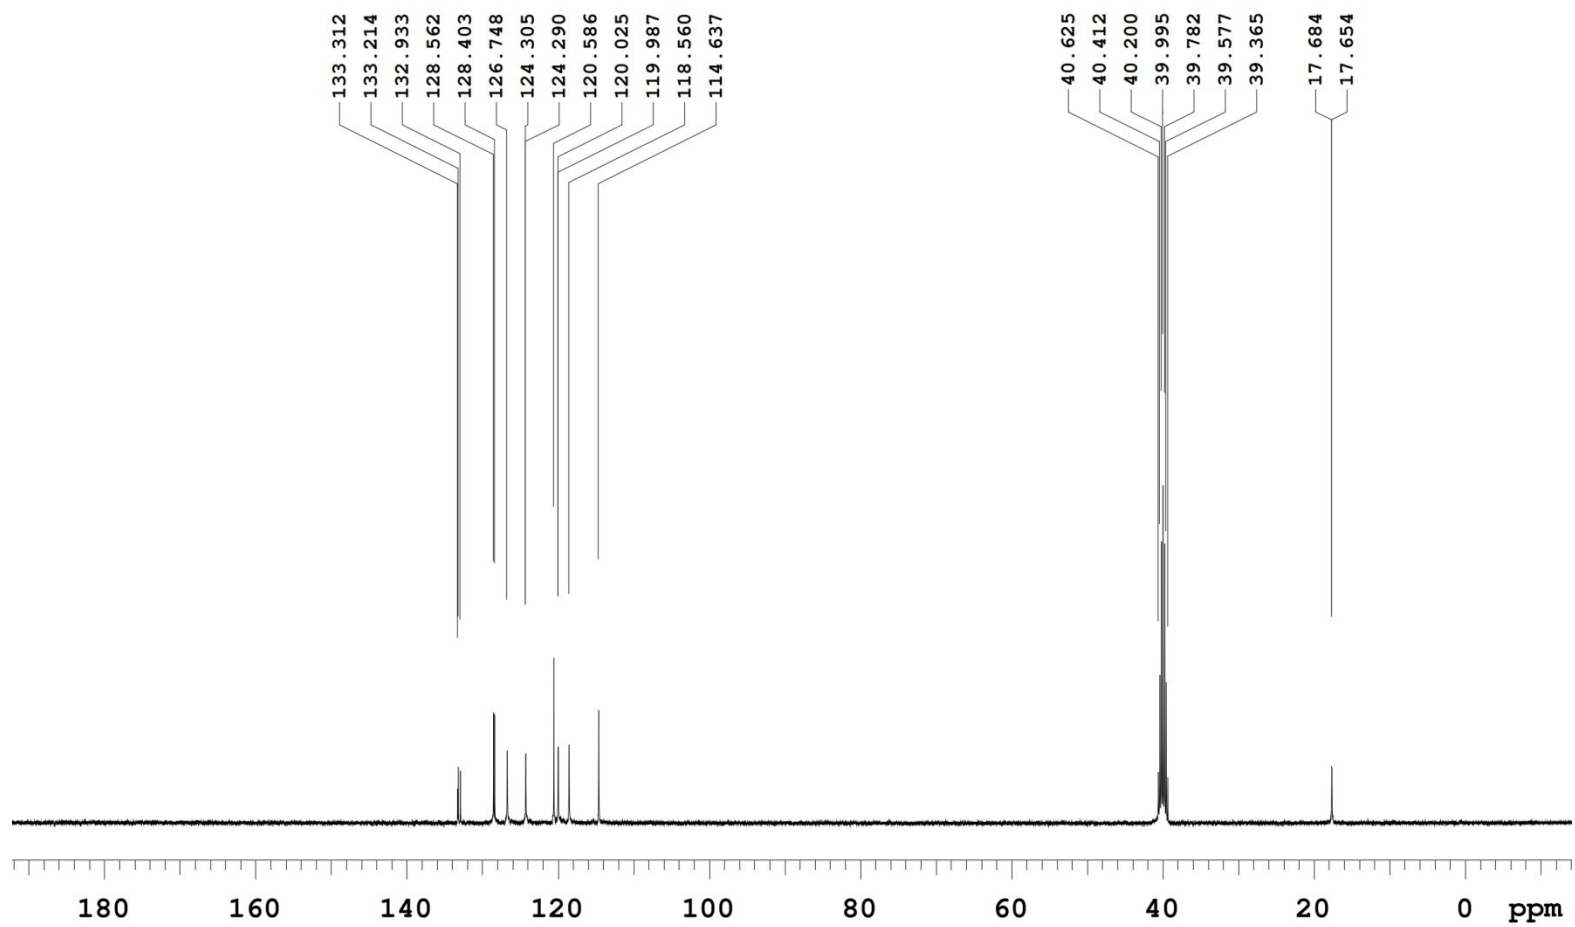

<sup>13</sup>C NMR of 3n

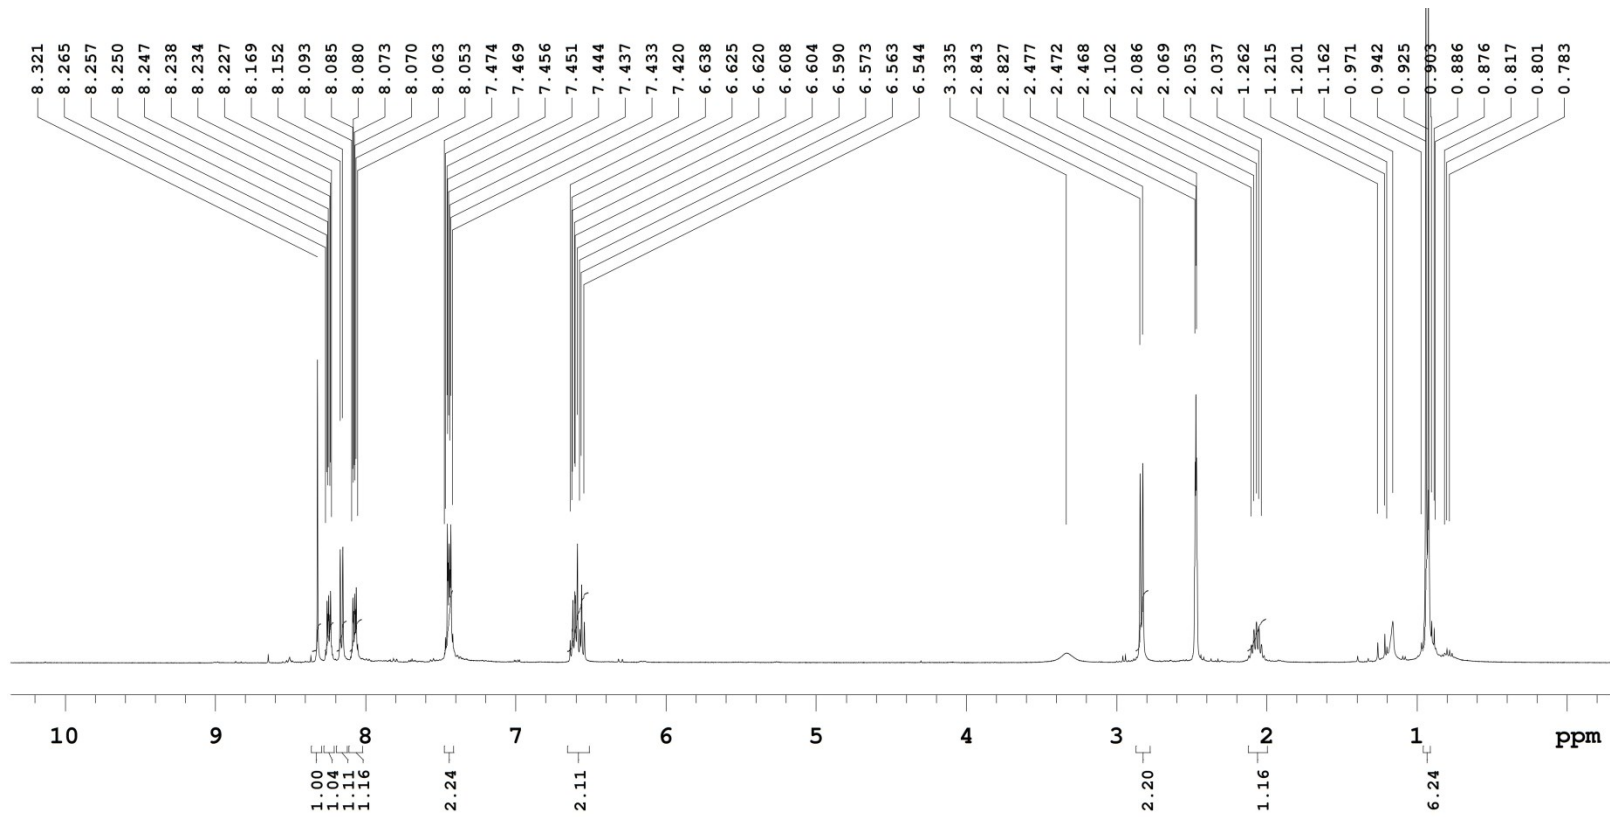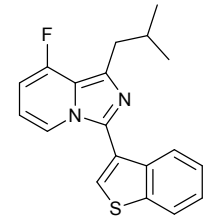

**<sup>13</sup>C NMR of 3n**

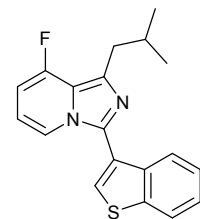

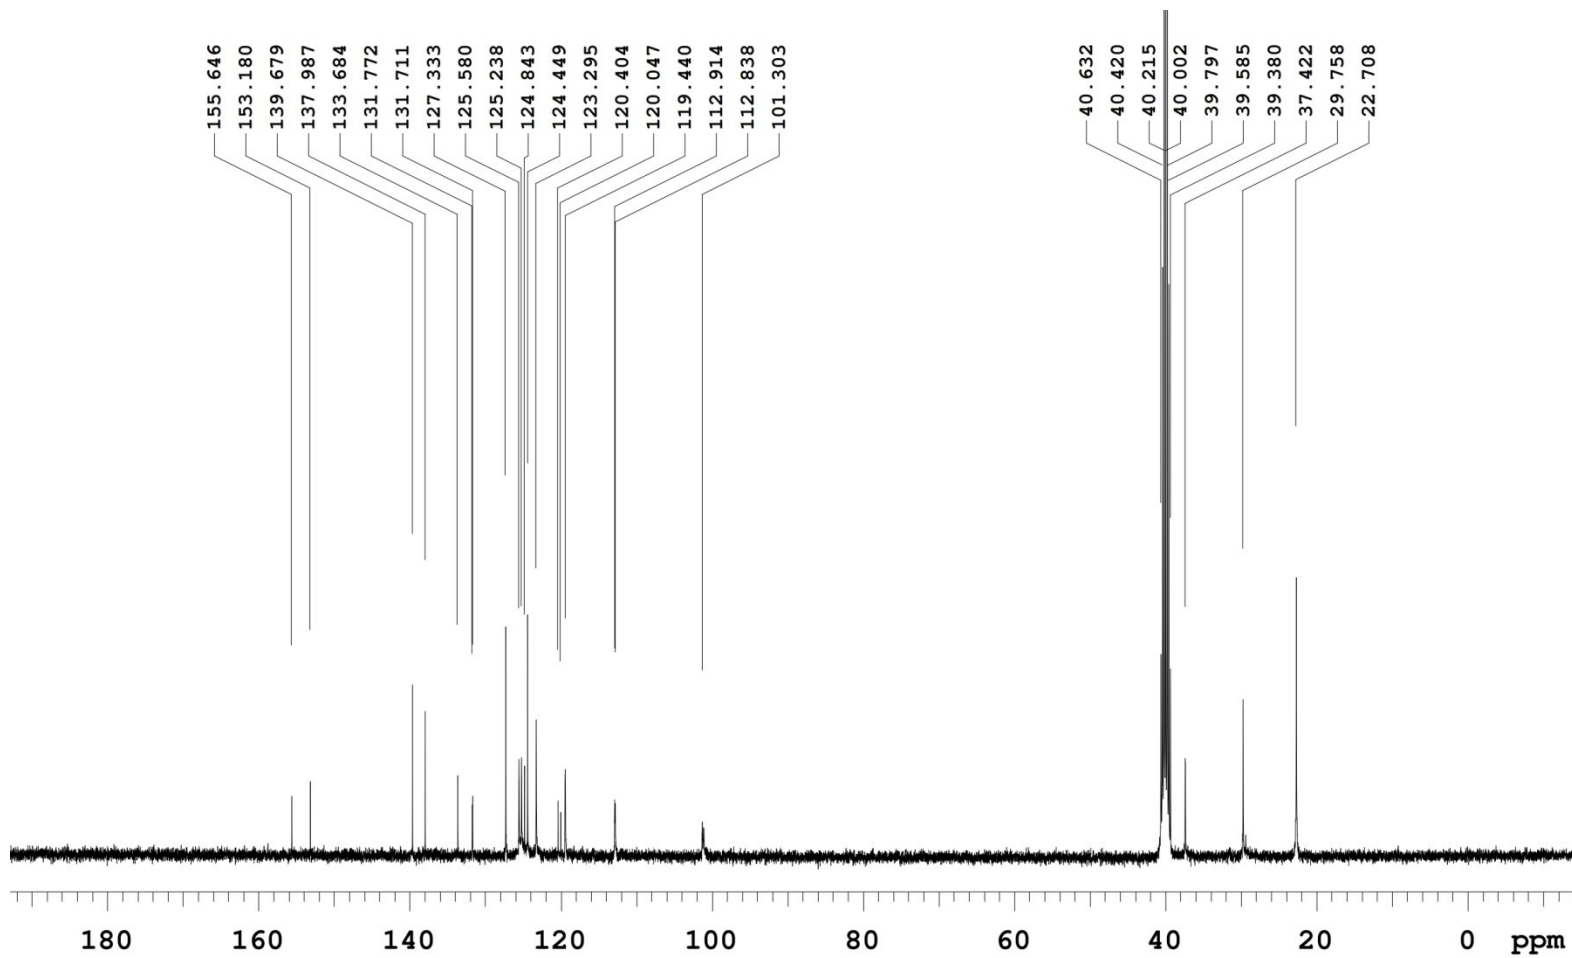

<sup>13</sup>C NMR of 3o

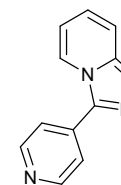

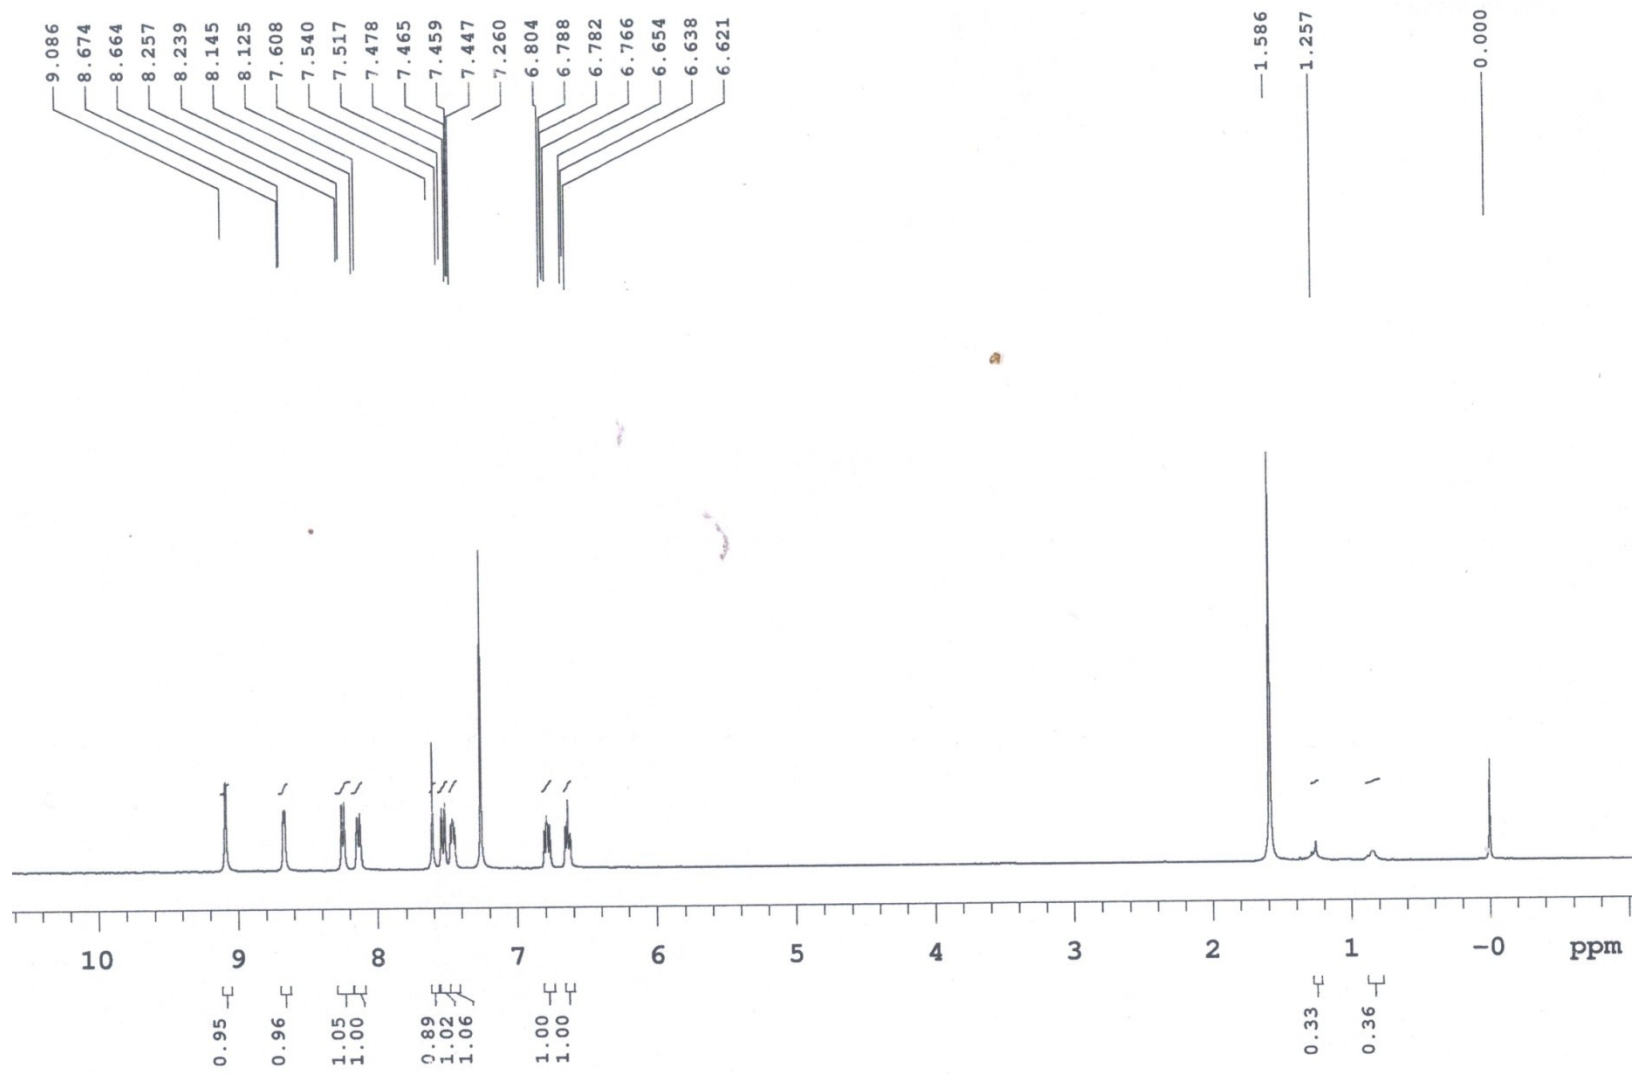



<sup>13</sup>C NMR of 3o

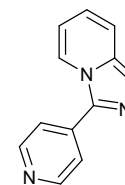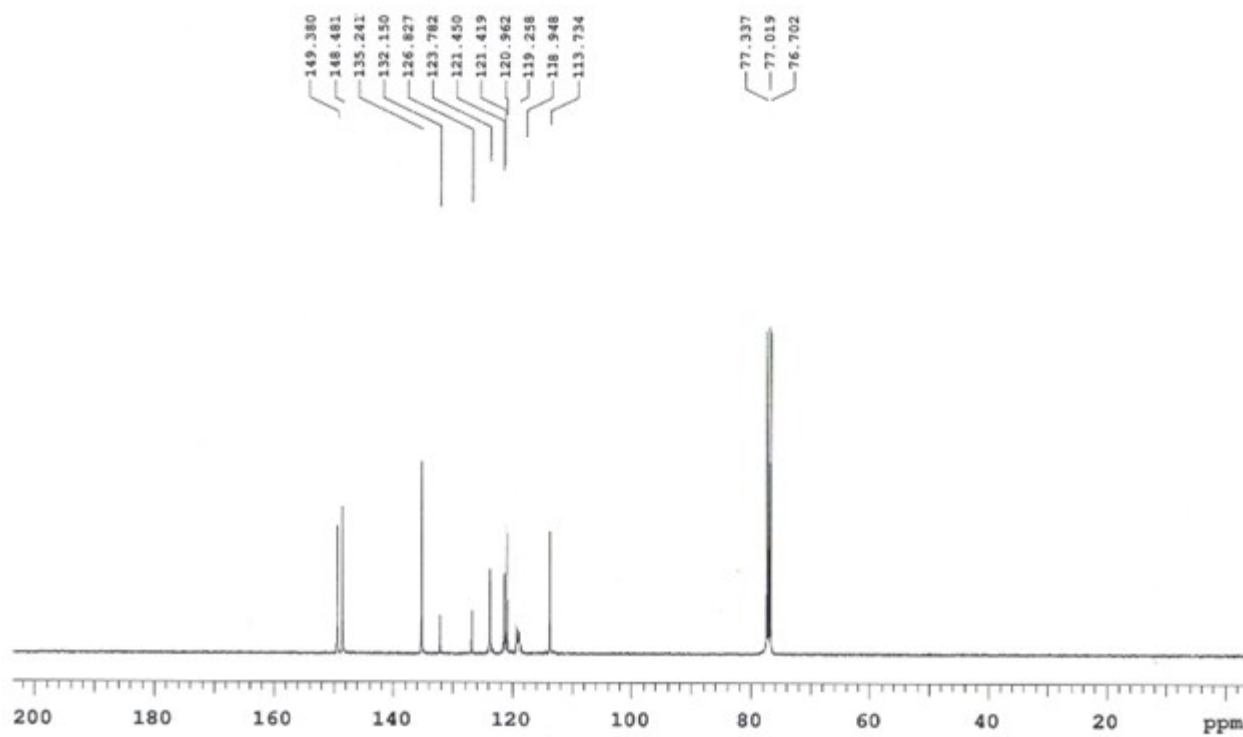

<sup>1</sup>H NMR of 3p

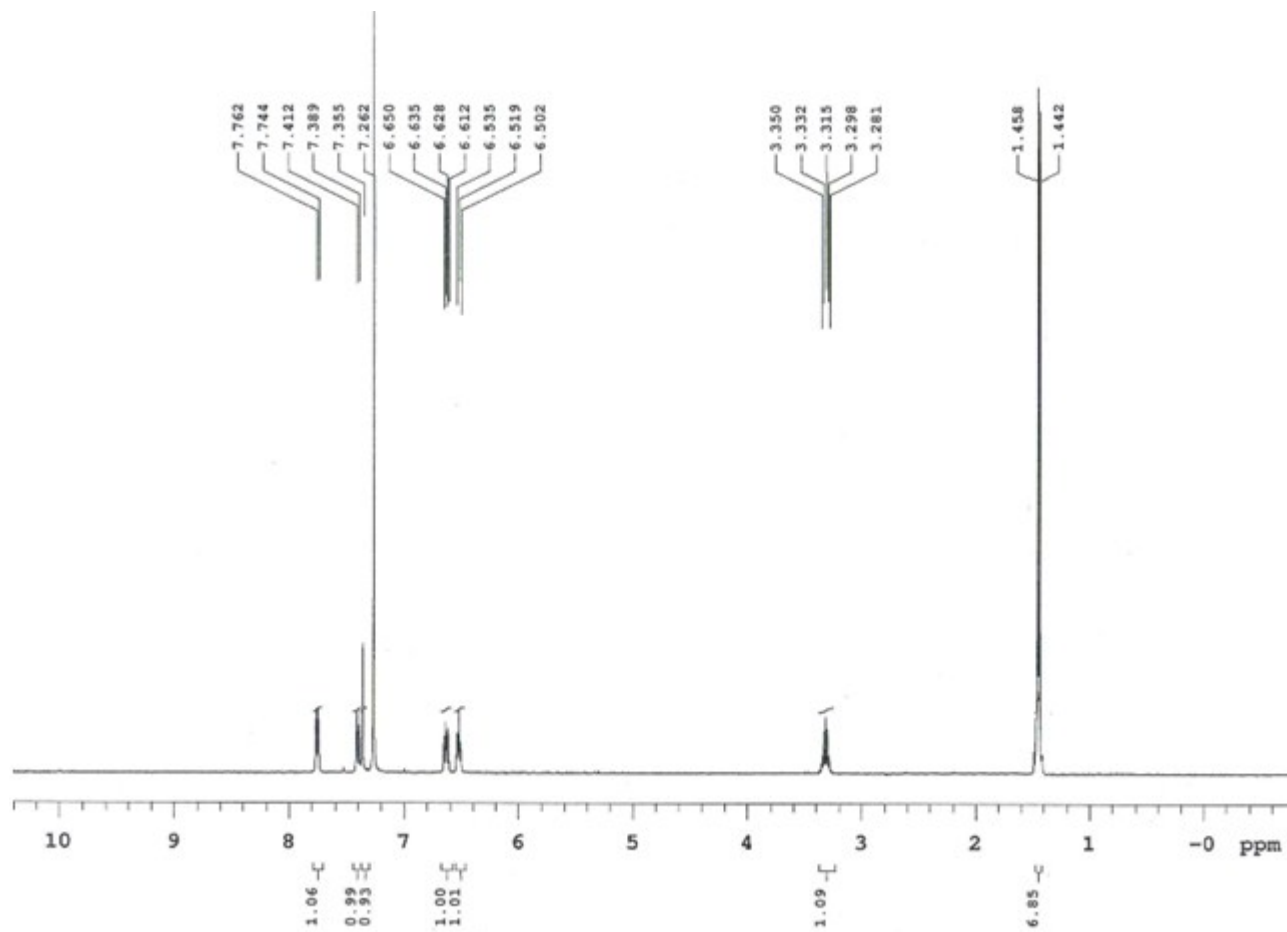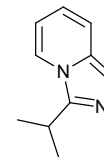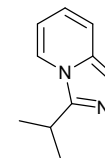

**<sup>13</sup>C NMR of 3p**

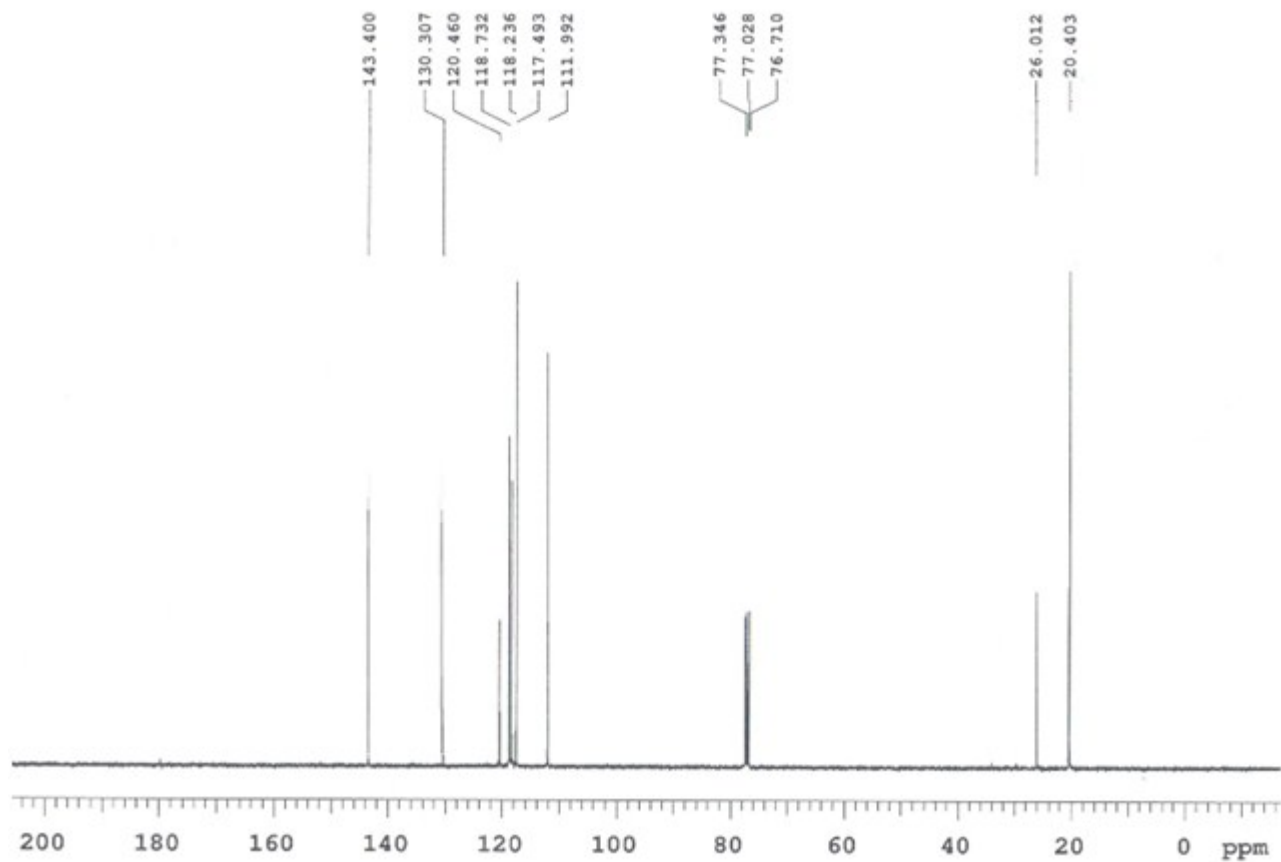

<sup>1</sup>H NMR of 3q

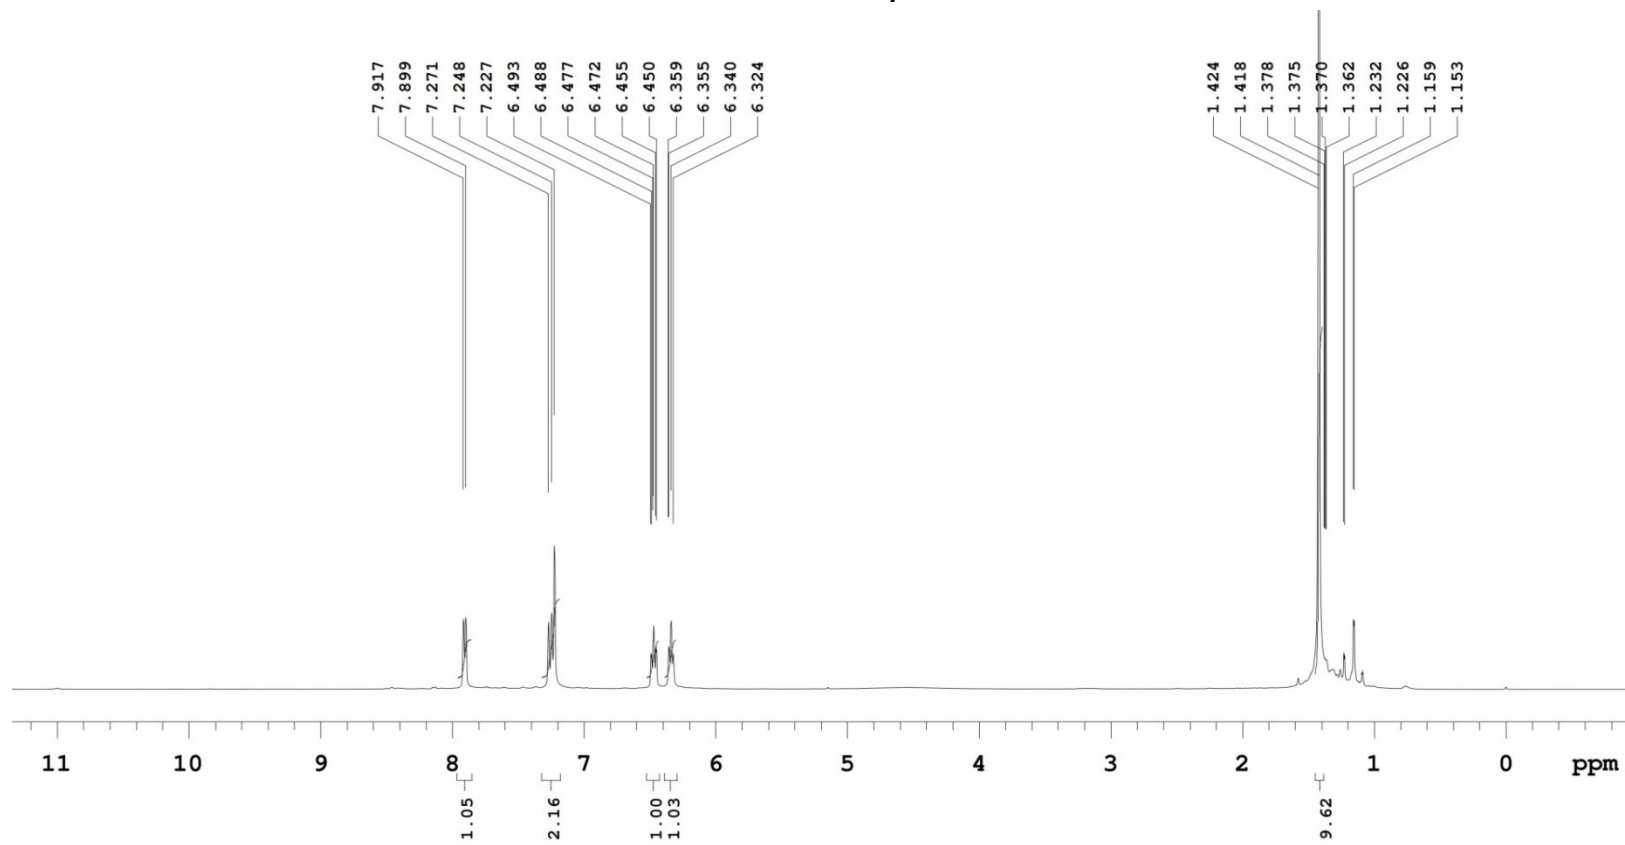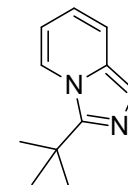

<sup>13</sup>C NMR of 3q

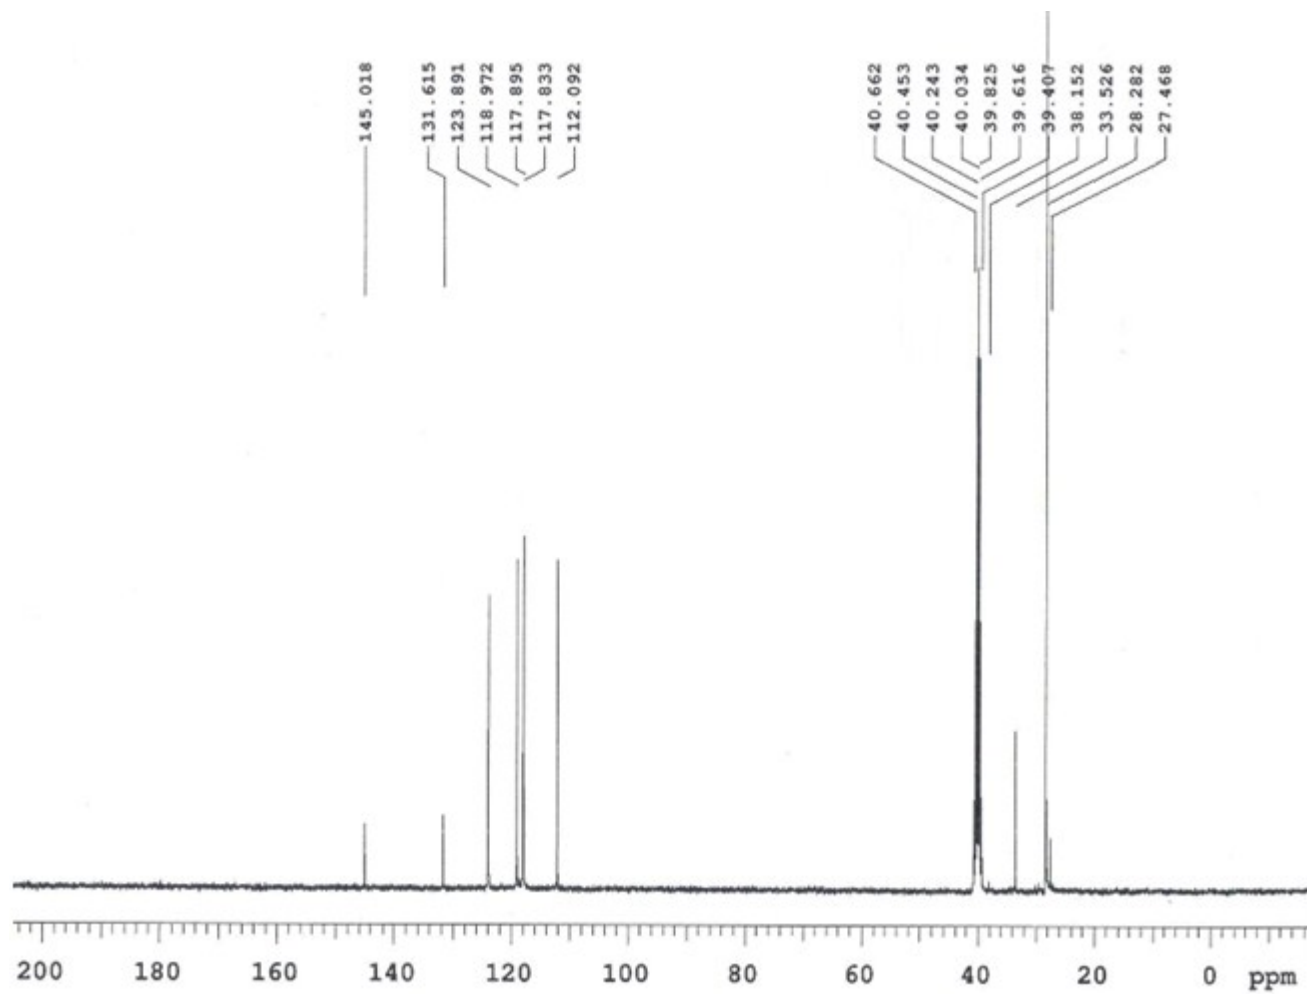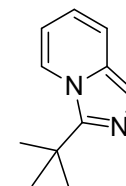

<sup>1</sup>H NMR of 5a

S37

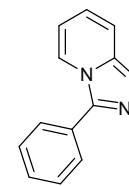

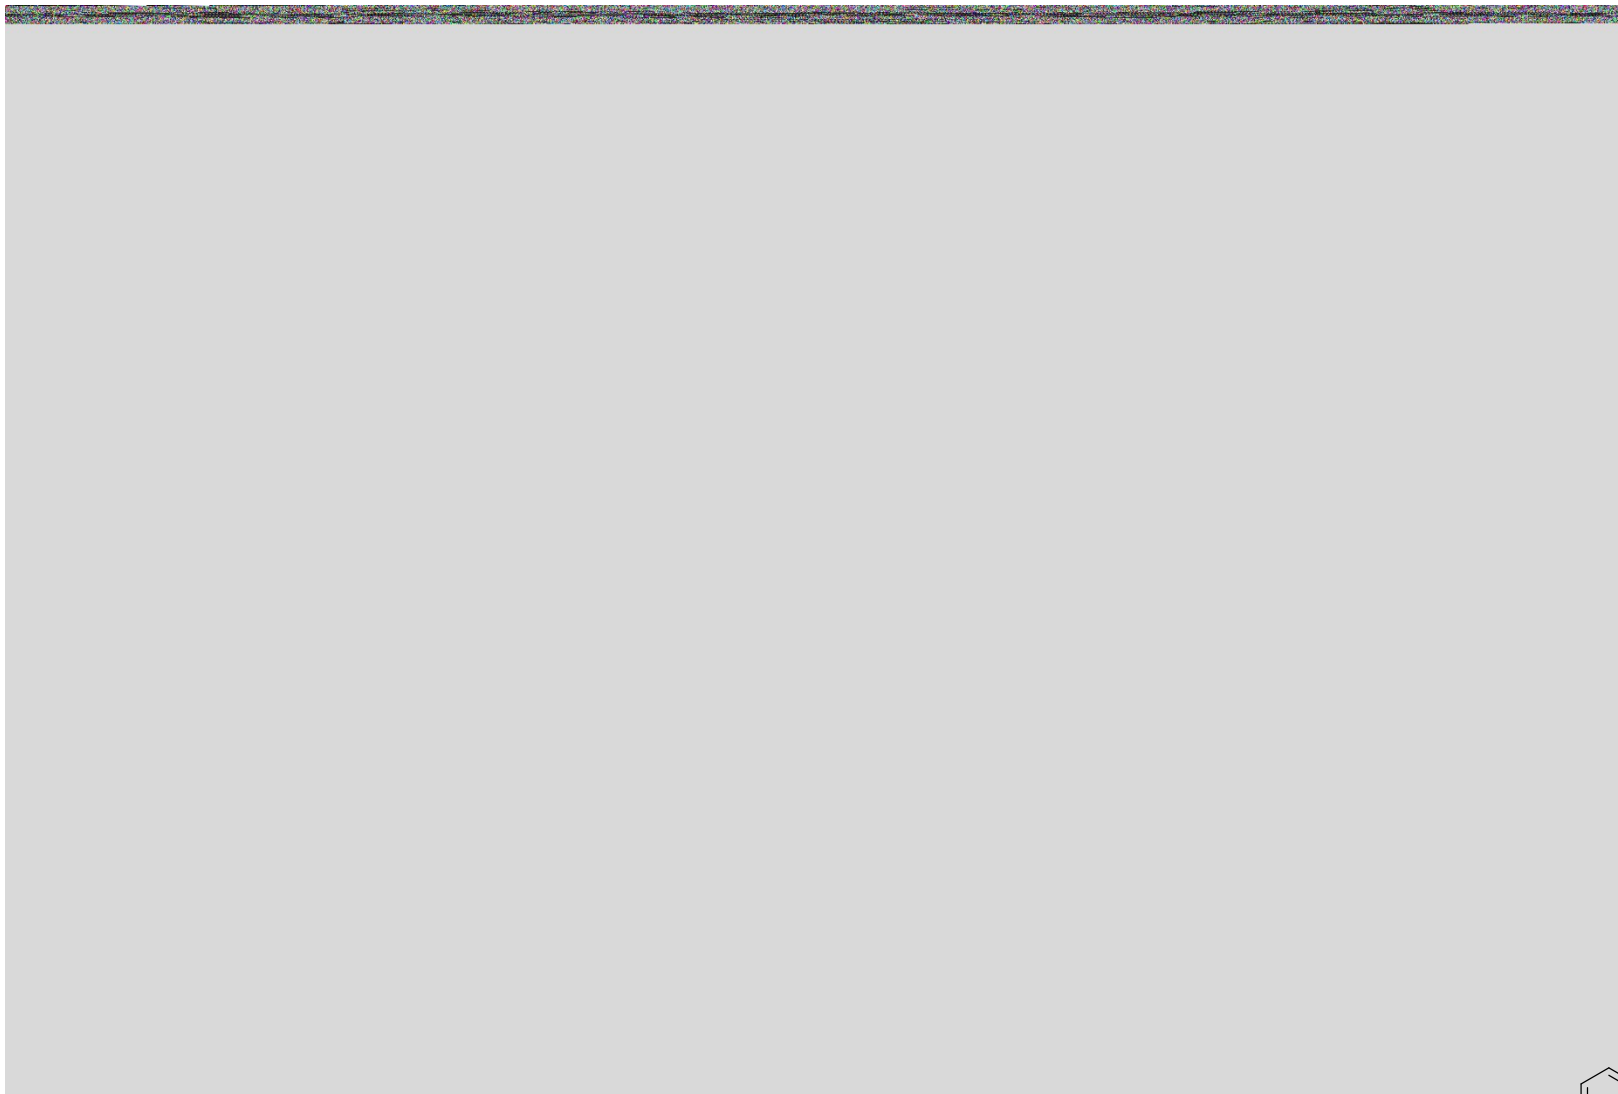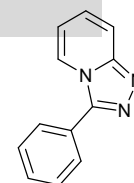

**<sup>13</sup>C NMR of 5a**

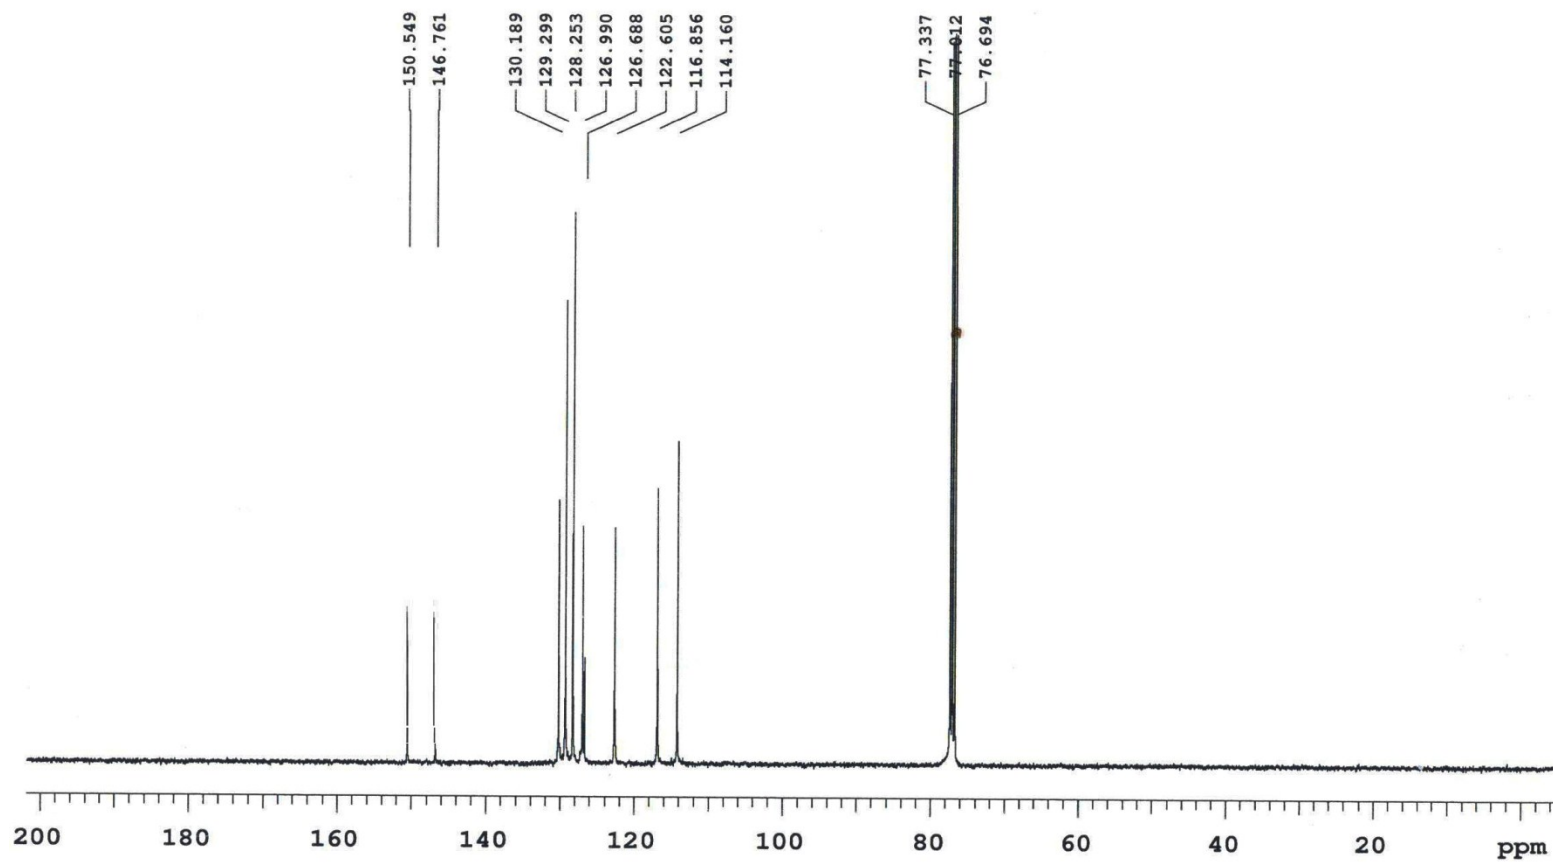

**<sup>1</sup>H NMR of 5b**

S39

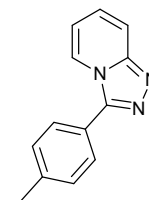

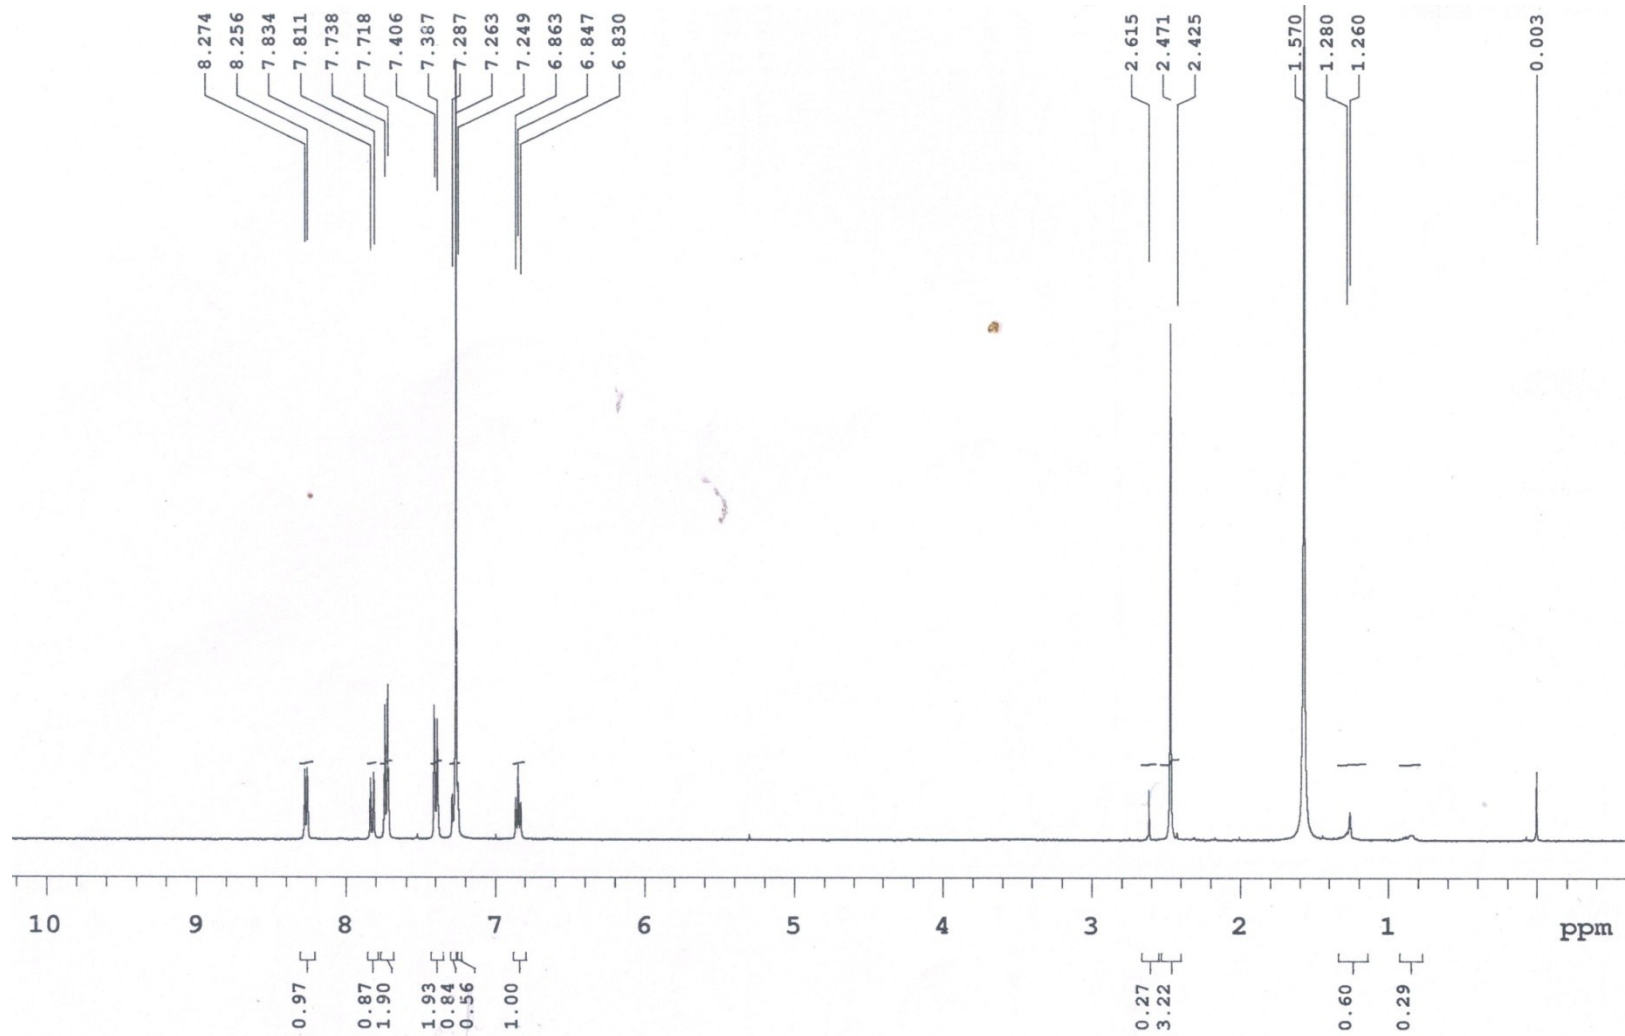

**<sup>13</sup>C NMR of 5b**

S40

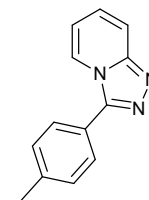



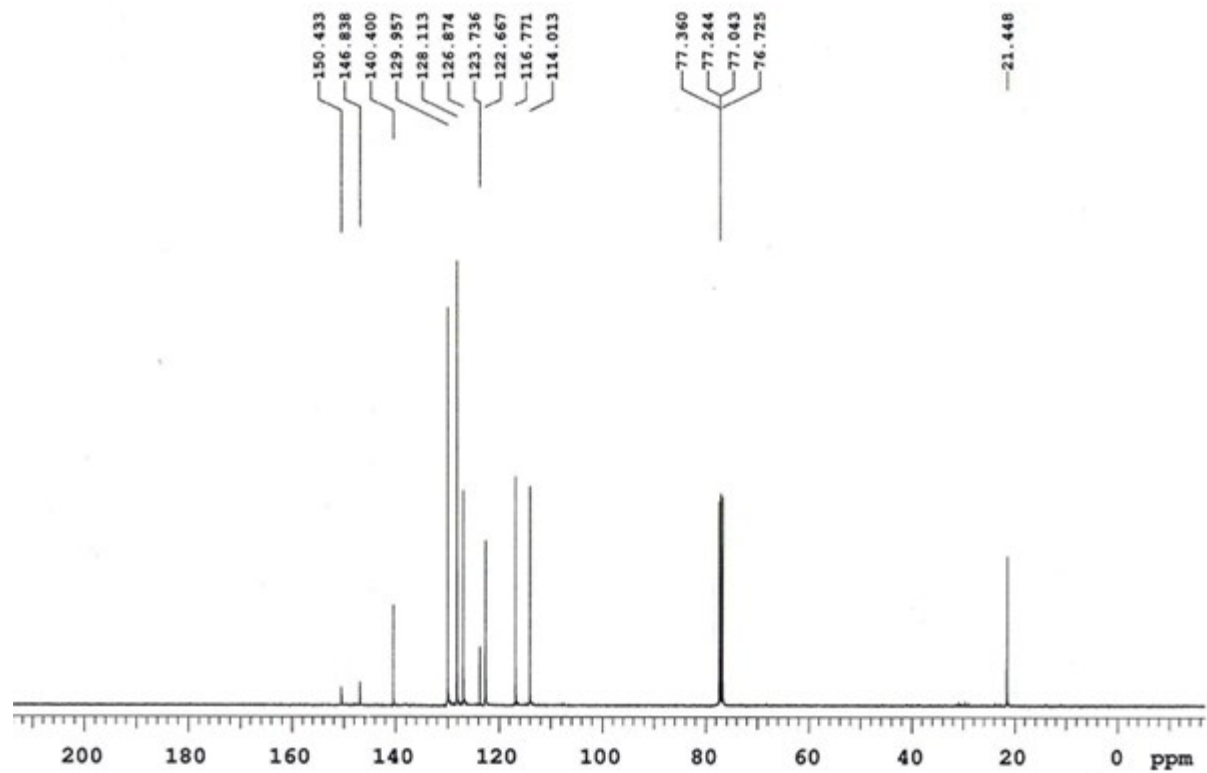

$^{13}\text{C}$  NMR of 5c

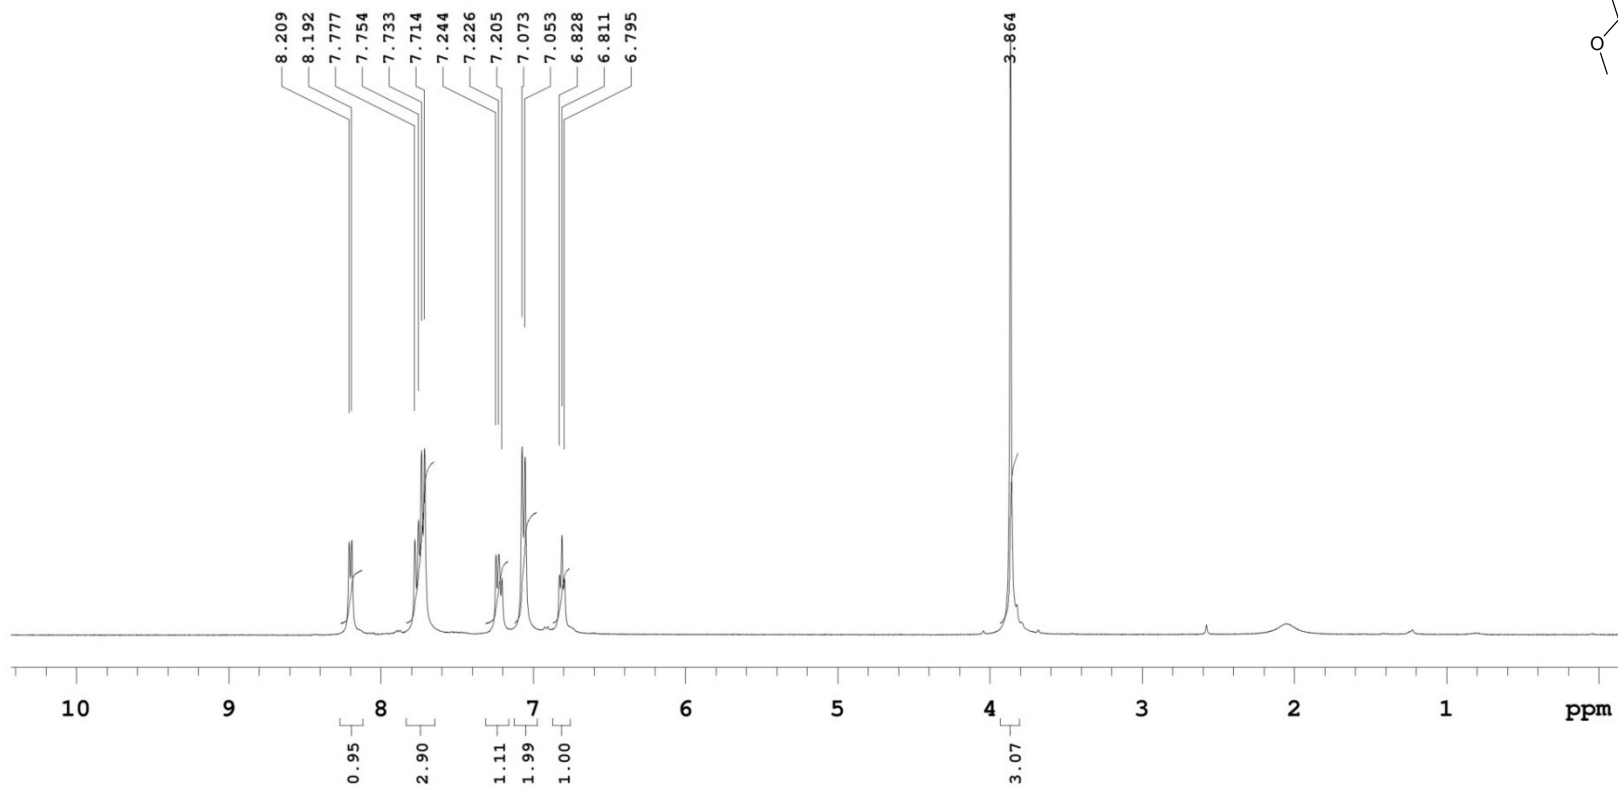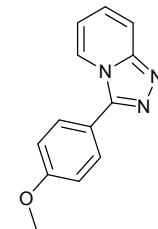

<sup>13</sup>C NMR of 5c

S42

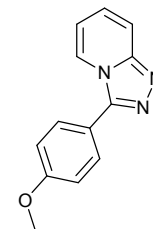

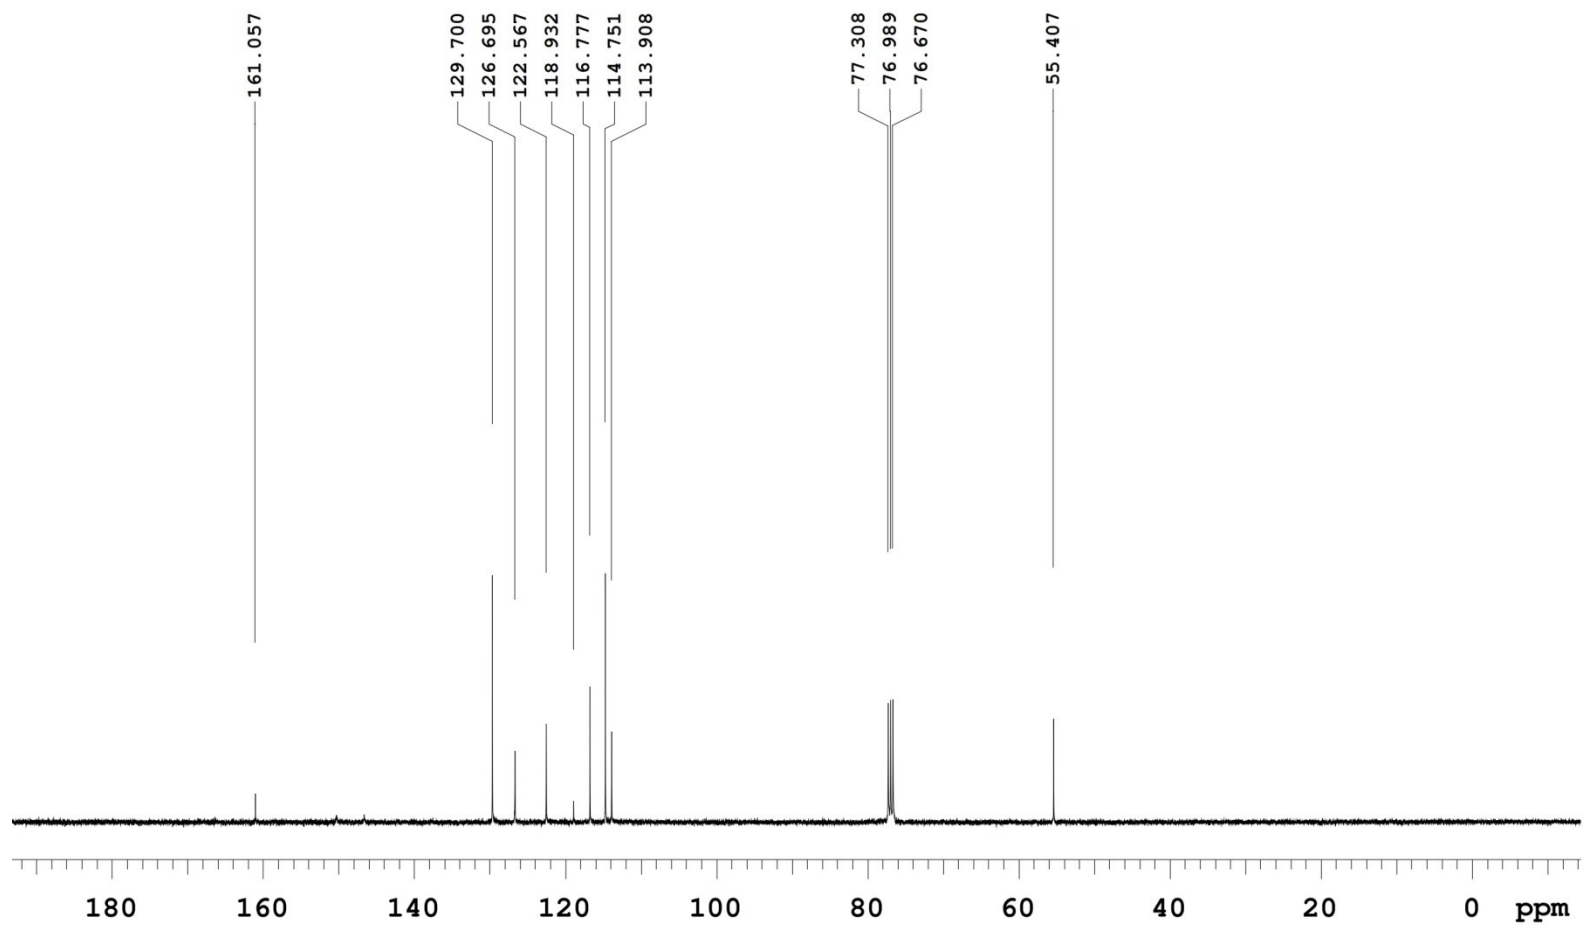

<sup>1</sup>H NMR of 5d

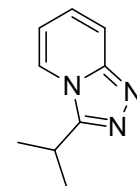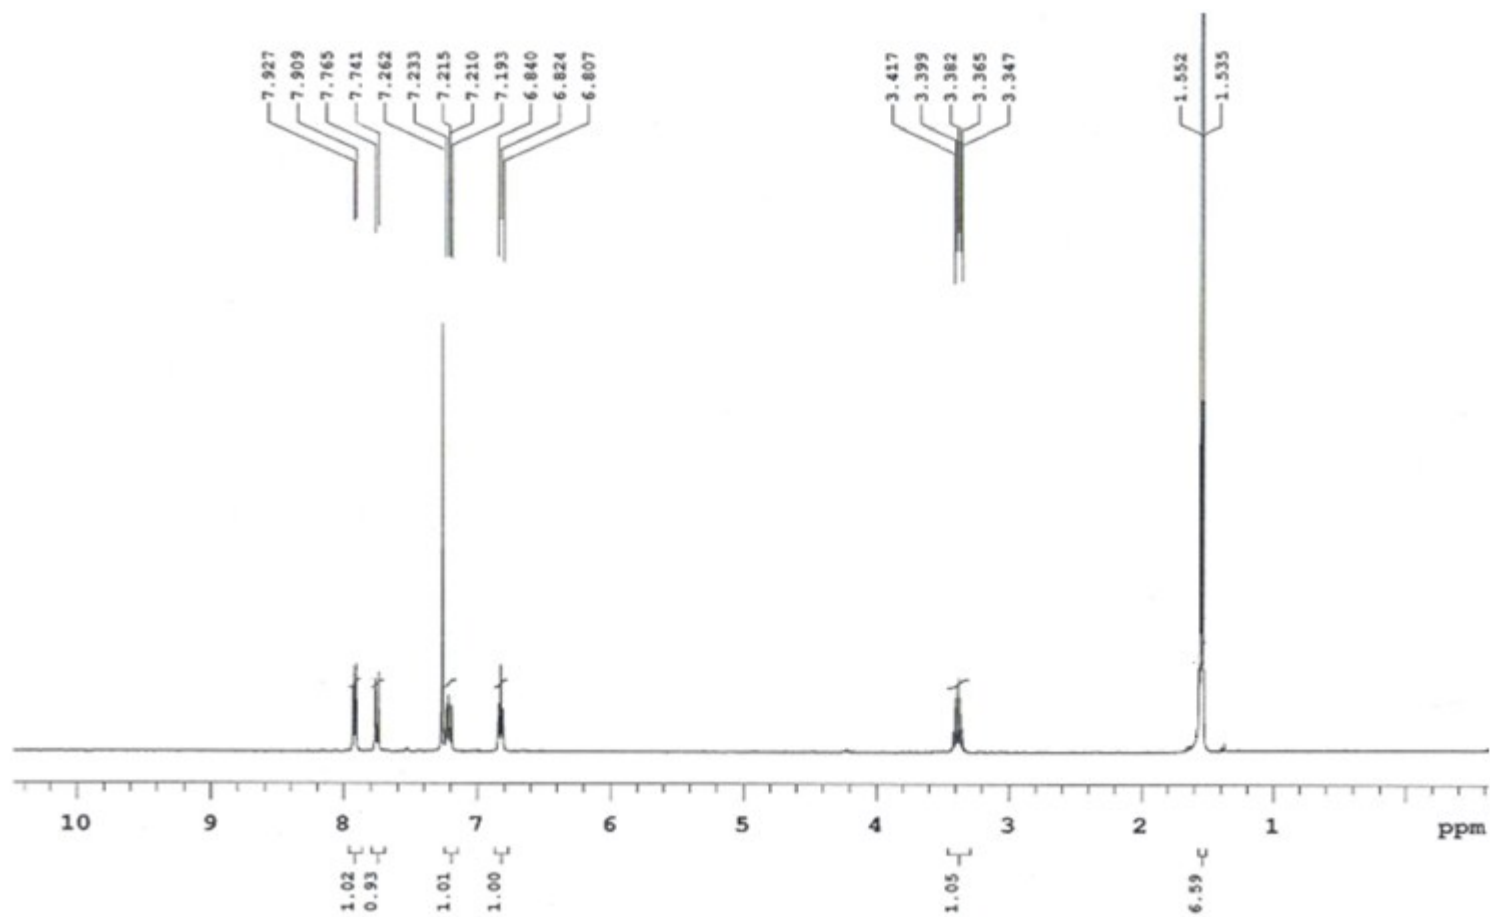

<sup>13</sup>C NMR of 5d

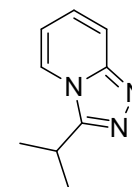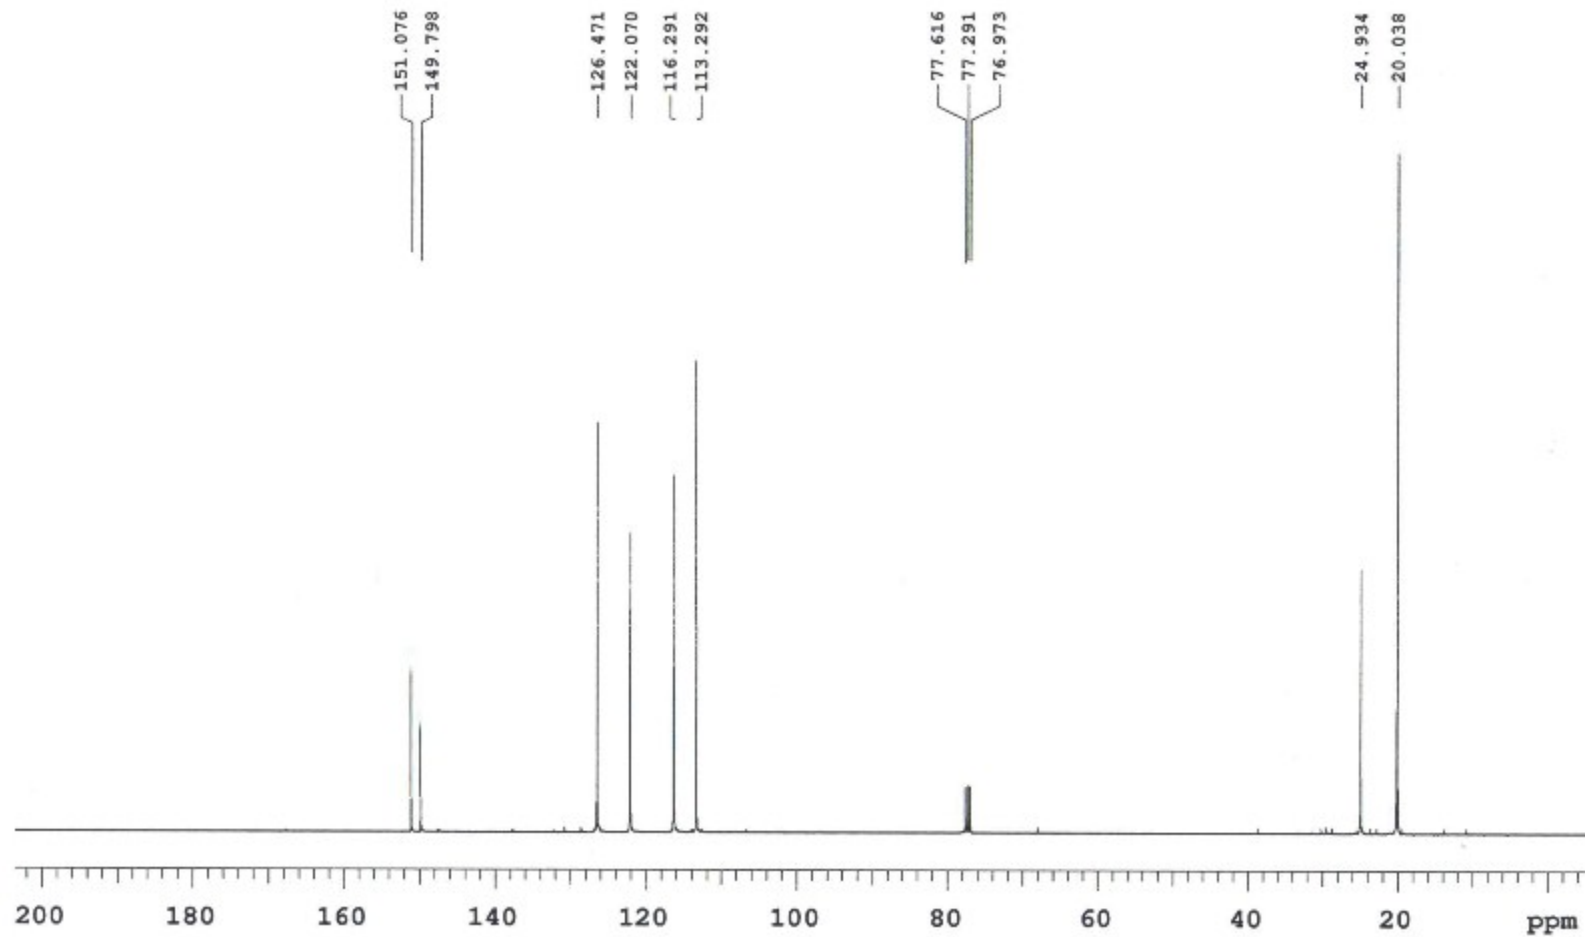

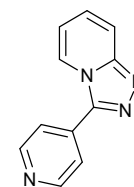

<sup>1</sup>H NMR of 5e

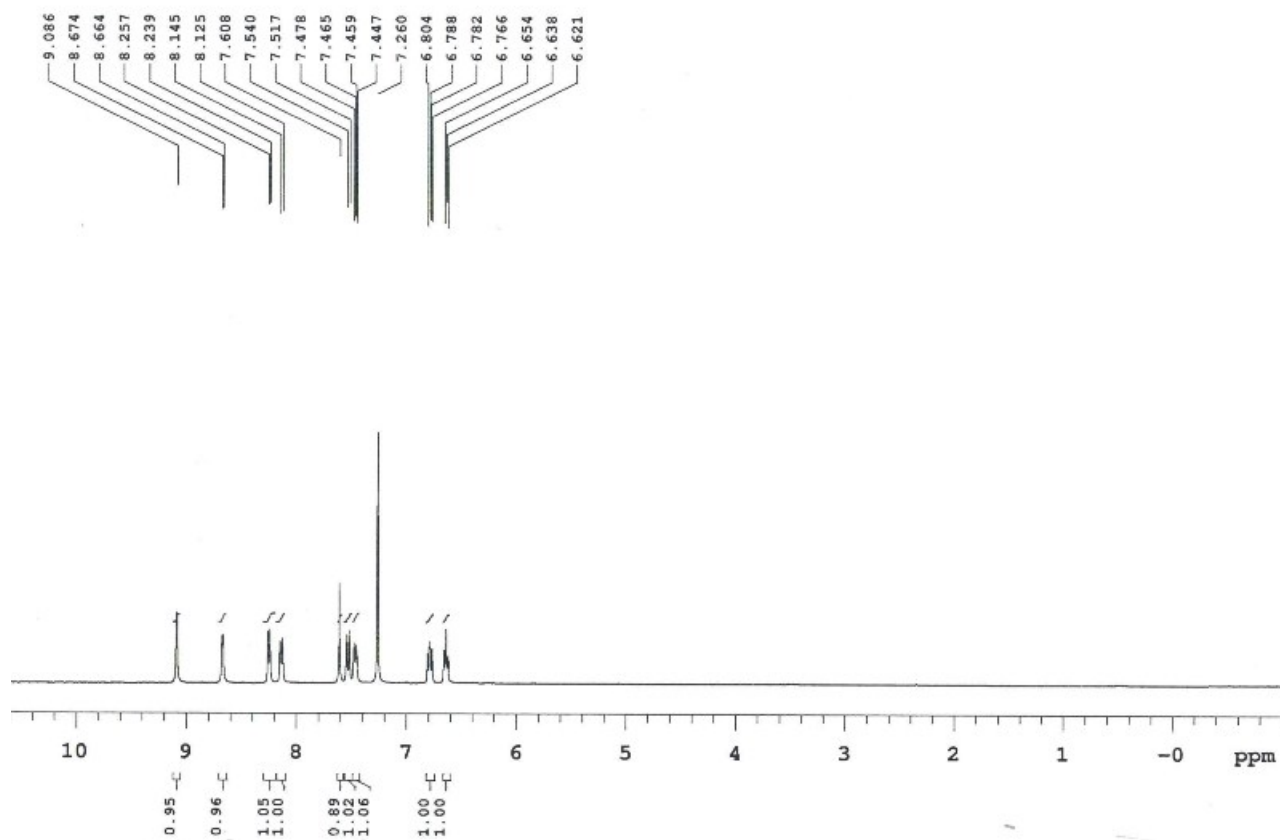

<sup>13</sup>C NMR of 5e

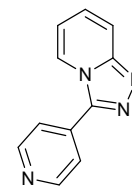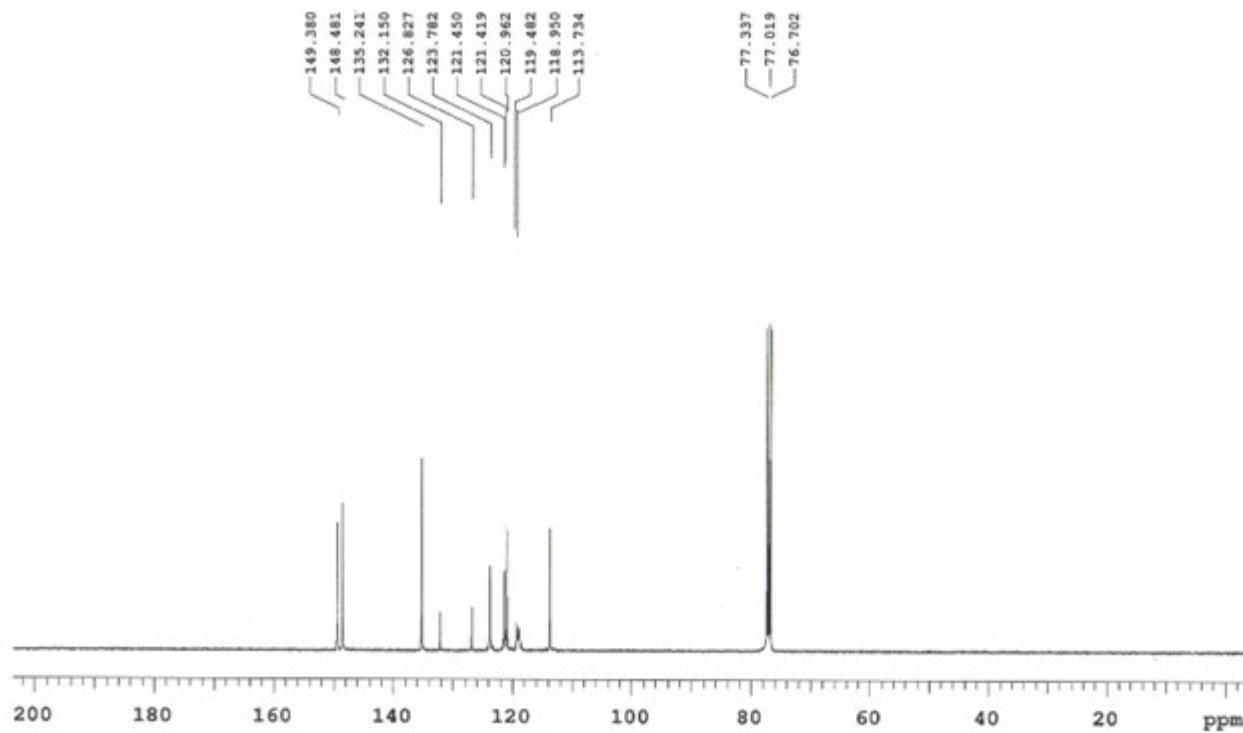

Supplement: c6nj01038e1.pdf [file c6nj01038e1.pdf]
